# Supplementary material for: Supramolecular charge transfer adducts of rare earth 3,5-dinitrobenzoates and diaminodurene: a new approach to increasing spin density in lanthanide complexes
Source: Royal Society of Chemistry journal article supplement (doi:10.1039/d4me00124a), 2024-11-15
Supplement: d4me00124a1.pdf [file d4me00124a1.pdf]

**Supramolecular charge transfer adducts of rare earth  
3,5-dinitrobenzoates and diaminodurene: a new approach to  
increasing spin density in lanthanide complexes**

Pavel S. Koroteev<sup>1\*</sup>, Andrey B. Ilyukhin<sup>1</sup>, Vadim V. Minin<sup>1</sup>,  
Zhanna V. Dobrokhotova<sup>1</sup>, Natalia N. Breslavskaya<sup>1</sup>, Elena N. Timokhina<sup>2</sup>, Elena A. Ugolkova<sup>1</sup>,  
Amgalanbaatar Baldansuren<sup>3,4</sup>, Floriana Tuna<sup>3</sup>, Nikolay N. Efimov<sup>1</sup>

*<sup>1</sup>N.S. Kurnakov Institute of General and Inorganic Chemistry, Russian Academy of Sciences,  
Leninsky prosp. 31, 119991 Moscow, GSP-1, Russian Federation*

*<sup>2</sup>N. M. Emanuel Institute of Biochemical Physics, Russian Academy of Sciences, 4 Kosygina str.,  
119334 Moscow, Russian Federation*

*<sup>3</sup> EPSRC National EPR Facility and Service, Department of Chemistry and Photon Science  
Institute, University of Manchester, Manchester, M13 9PL, UK*

*<sup>4</sup>Department of Chemistry and Chemical Biology, Rensselaer Polytechnic Institute, Troy, NY  
12180, USA*

SUPPLEMENTARY MATERIALS

**Table S1.** Crystal data and structure refinement for compounds 1-7.

|                                                | <b>1</b>                                                                                        | <b>2</b>                                                                                        | <b>3</b>                                                                                        | <b>4</b>                                                                                        | <b>5</b>                                                                                        | <b>6</b>                                                                                        | <b>7</b>                                                                                       |
|------------------------------------------------|-------------------------------------------------------------------------------------------------|-------------------------------------------------------------------------------------------------|-------------------------------------------------------------------------------------------------|-------------------------------------------------------------------------------------------------|-------------------------------------------------------------------------------------------------|-------------------------------------------------------------------------------------------------|------------------------------------------------------------------------------------------------|
| Identification code                            |                                                                                                 |                                                                                                 |                                                                                                 |                                                                                                 |                                                                                                 |                                                                                                 |                                                                                                |
| Empirical formula                              | C <sub>90</sub> H <sub>106</sub> N <sub>20</sub> O <sub>40</sub> S <sub>4</sub> Sm <sub>2</sub> | C <sub>90</sub> H <sub>106</sub> Gd <sub>2</sub> N <sub>20</sub> O <sub>40</sub> S <sub>4</sub> | C <sub>90</sub> H <sub>106</sub> N <sub>20</sub> O <sub>40</sub> S <sub>4</sub> Tb <sub>2</sub> | C <sub>90</sub> H <sub>106</sub> Dy <sub>2</sub> N <sub>20</sub> O <sub>40</sub> S <sub>4</sub> | C <sub>90</sub> H <sub>106</sub> Ho <sub>2</sub> N <sub>20</sub> O <sub>40</sub> S <sub>4</sub> | C <sub>90</sub> H <sub>106</sub> Er <sub>2</sub> N <sub>20</sub> O <sub>40</sub> S <sub>4</sub> | C <sub>90</sub> H <sub>106</sub> N <sub>20</sub> O <sub>40</sub> S <sub>4</sub> Y <sub>2</sub> |
| Formula weight                                 | 2536.88                                                                                         | 2550.68                                                                                         | 2554.02                                                                                         | 2561.18                                                                                         | 2566.04                                                                                         | 2570.70                                                                                         | 2414.00                                                                                        |
| Temperature, K                                 | 173(2)                                                                                          | 120(2)                                                                                          | 173(2)                                                                                          | 173(2)                                                                                          | 173(2)                                                                                          | 153(2)                                                                                          | 120(2)                                                                                         |
| Wavelength, Å                                  | 0.71073                                                                                         | 0.71073                                                                                         | 0.71073                                                                                         | 0.71073                                                                                         | 0.71073                                                                                         | 0.71073                                                                                         | 0.71073                                                                                        |
| Crystal system                                 | Monoclinic                                                                                      | Monoclinic                                                                                      | Monoclinic                                                                                      | Monoclinic                                                                                      | Monoclinic                                                                                      | Monoclinic                                                                                      | Monoclinic                                                                                     |
| Space group                                    | P2 <sub>1</sub> /n                                                                              | P2 <sub>1</sub> /n                                                                             |
| a, Å                                           | 13.6528(3)                                                                                      | 13.6059(6)                                                                                      | 13.6262(5)                                                                                      | 13.6161(3)                                                                                      | 13.6054(5)                                                                                      | 13.5955(6)                                                                                      | 13.5906(3)                                                                                     |
| b, Å                                           | 25.0658(5)                                                                                      | 24.9355(10)                                                                                     | 25.0293(8)                                                                                      | 25.0372(5)                                                                                      | 25.0164(9)                                                                                      | 25.0342(11)                                                                                     | 24.9418(5)                                                                                     |
| c, Å                                           | 15.3632(3)                                                                                      | 15.2921(6)                                                                                      | 15.3375(5)                                                                                      | 15.3325(3)                                                                                      | 15.3117(6)                                                                                      | 15.3116(7)                                                                                      | 15.2728(3)                                                                                     |
| β, °                                           | 98.3460(10)                                                                                     | 98.3190(10)                                                                                     | 98.1270(10)                                                                                     | 98.1250(10)                                                                                     | 98.1120(10)                                                                                     | 97.9640(10)                                                                                     | 98.1120(10)                                                                                    |
| Volume, Å <sup>3</sup>                         | 5201.89(19)                                                                                     | 5133.6(4)                                                                                       | 5178.4(3)                                                                                       | 5174.52(18)                                                                                     | 5159.3(3)                                                                                       | 5161.1(4)                                                                                       | 5125.28(18)                                                                                    |
| Z                                              | 2                                                                                               | 2                                                                                               | 2                                                                                               | 2                                                                                               | 2                                                                                               | 2                                                                                               | 2                                                                                              |
| D (calc), Mg/m <sup>3</sup>                    | 1.620                                                                                           | 1.650                                                                                           | 1.638                                                                                           | 1.644                                                                                           | 1.652                                                                                           | 1.654                                                                                           | 1.564                                                                                          |
| μ, mm <sup>-1</sup>                            | 1.296                                                                                           | 1.462                                                                                           | 1.534                                                                                           | 1.613                                                                                           | 1.703                                                                                           | 1.795                                                                                           | 1.308                                                                                          |
| F(000)                                         | 2588                                                                                            | 2596                                                                                            | 2600                                                                                            | 2604                                                                                            | 2608                                                                                            | 2612                                                                                            | 2496                                                                                           |
| Crystal size, mm                               | 0.32 x 0.24 x 0.2                                                                               | 0.24 x 0.18 x 0.16                                                                              | 0.3 x 0.24 x 0.2                                                                                | 0.3 x 0.26 x 0.2                                                                                | 0.3 x 0.26 x 0.2                                                                                | 0.35 x 0.3 x 0.2                                                                                | 0.28 x 0.24 x 0.2                                                                              |
| θ range, °                                     | 2.305, 31.056                                                                                   | 2.314, 26.424                                                                                   | 2.305, 31.540                                                                                   | 2.306, 32.029                                                                                   | 2.308, 31.554                                                                                   | 2.306, 31.528                                                                                   | 2.049, 28.315                                                                                  |
| Index ranges                                   | -19<=h<=19<br>-27<=k<=36<br>-22<=l<=22                                                          | -16<=h<=16<br>-31<=k<=30<br>-19<=l<=18                                                          | -20<=h<=19<br>-36<=k<=36<br>-22<=l<=22                                                          | -19<=h<=19<br>-35<=k<=36<br>-22<=l<=21                                                          | -19<=h<=19<br>-36<=k<=36<br>-21<=l<=21                                                          | -19<=h<=19<br>-36<=k<=36<br>-22<=l<=21                                                          | -18<=h<=17<br>-33<=k<=33<br>-20<=l<=20                                                         |
| Reflections collected                          | 49055                                                                                           | 54280                                                                                           | 74116                                                                                           | 74742                                                                                           | 72766                                                                                           | 73754                                                                                           | 57606                                                                                          |
| Independent reflections, Rint                  | 16113, 0.0316                                                                                   | 10506, 0.0604                                                                                   | 16613, 0.0339                                                                                   | 16588, 0.0377                                                                                   | 16481, 0.0373                                                                                   | 16536, 0.0324                                                                                   | 12745, 0.0599                                                                                  |
| Completeness to θ = 25.242°                    | 99.9 %                                                                                          | 99.9 %                                                                                          | 99.9 %                                                                                          | 99.9 %                                                                                          | 99.9 %                                                                                          | 99.9 %                                                                                          | 100.0 %                                                                                        |
| Absorption correction                          | Semi-empirical<br>from equivalents                                                              | Semi-empirical<br>from equivalents                                                             |
| Max., min. transmission                        | 0.7462, 0.594                                                                                   | 0.7454, 0.6486                                                                                  | 0.7462, 0.5587                                                                                  | 0.7463, 0.6097                                                                                  | 0.7462, 0.585                                                                                   | 0.7462, 0.6174                                                                                  | 0.7457, 0.5937                                                                                 |
| Refinement method                              | Full-matrix<br>least-squares on F <sup>2</sup>                                                  | Full-matrix<br>least-squares on F <sup>2</sup>                                                 |
| Data / restraints / parameters                 | 16113 / 0 / 718                                                                                 | 10506 / 0 / 719                                                                                 | 16613 / 0 / 719                                                                                 | 16588 / 0 / 716                                                                                 | 16481 / 0 / 718                                                                                 | 16536 / 0 / 718                                                                                 | 12745 / 0 / 719                                                                                |
| Goodness-of-fit                                | 1.037                                                                                           | 1.084                                                                                           | 1.065                                                                                           | 1.044                                                                                           | 1.052                                                                                           | 1.094                                                                                           | 1.055                                                                                          |
| R1, wR2 [I>2σ(I)]                              | 0.0320, 0.0769                                                                                  | 0.0400, 0.0885                                                                                  | 0.0310, 0.0790                                                                                  | 0.0320, 0.0790                                                                                  | 0.0332, 0.0798                                                                                  | 0.0315, 0.0813                                                                                  | 0.0487, 0.1245                                                                                 |
| R1, wR2 (all data)                             | 0.0428, 0.0818                                                                                  | 0.0608, 0.0972                                                                                  | 0.0410, 0.0841                                                                                  | 0.0436, 0.0847                                                                                  | 0.0465, 0.0863                                                                                  | 0.0419, 0.0865                                                                                  | 0.0826, 0.1398                                                                                 |
| Largest diff. peak and hole, e.Å <sup>-3</sup> | 1.310, -0.546                                                                                   | 1.674, -0.760                                                                                   | 1.064, -0.683                                                                                   | 1.148, -0.648                                                                                   | 1.319, -0.742                                                                                   | 1.369, -0.830                                                                                   | 1.208, -0.794                                                                                  |

**Table S2.** Bond lengths Ln-O for **1-7**, Å.

| Identification code | <b>1</b>   | <b>2</b>  | <b>3</b>   | <b>4</b>   | <b>5</b>   | <b>6</b>   | <b>7</b>  |
|---------------------|------------|-----------|------------|------------|------------|------------|-----------|
| Ln                  | Sm         | Gd        | Tb         | Dy         | Ho         | Er         | Y         |
| Ln(1)-O(8)#1        | 2.3626(15) | 2.330(3)  | 2.3196(16) | 2.3079(17) | 2.2934(18) | 2.2788(17) | 2.294(2)  |
| Ln(1)-O(1)          | 2.3696(15) | 2.346(3)  | 2.3338(16) | 2.3221(17) | 2.3107(18) | 2.2995(18) | 2.310(2)  |
| Ln(1)-O(19)         | 2.3709(16) | 2.348(3)  | 2.3342(17) | 2.3198(17) | 2.3113(18) | 2.2993(19) | 2.300(2)  |
| Ln(1)-O(2)#1        | 2.3819(15) | 2.347(3)  | 2.3383(16) | 2.3266(17) | 2.3147(17) | 2.3001(17) | 2.311(2)  |
| Ln(1)-O(7)          | 2.4155(15) | 2.387(3)  | 2.3793(16) | 2.3675(16) | 2.3546(17) | 2.3437(17) | 2.354(2)  |
| Ln(1)-O(13)         | 2.4417(15) | 2.410(3)  | 2.3998(16) | 2.3876(17) | 2.3788(18) | 2.3685(17) | 2.375(2)  |
| Ln(1)-O(20)         | 2.4603(15) | 2.434(3)  | 2.4253(17) | 2.4157(18) | 2.4041(18) | 2.3925(19) | 2.404(2)  |
| Ln(1)-O(14)         | 2.5540(17) | 2.531(3)  | 2.5214(18) | 2.5086(18) | 2.4938(19) | 2.487(2)   | 2.489(2)  |
| Ln(1)...Ln(1)#1     | 4.5680(2)  | 4.5383(4) | 4.5137(2)  | 4.5049(2)  | 4.4891(2)  | 4.4755(2)  | 4.4978(5) |

---

Symmetry transformations used to generate equivalent atoms:

#1 -x, -y, -z

**Table S3.** Hydrogen bonds for compound **3** (Å and °).

| D-H...A             | d(D-H) | d(H...A) | d(D...A) | <(DHA) |
|---------------------|--------|----------|----------|--------|
| N(7)-H(1)...O(7)    | 0.90   | 2.38     | 3.154(3) | 144    |
| N(7)-H(2)...O(13)   | 0.90   | 2.45     | 3.111(3) | 131    |
| N(8)-H(3)...O(17)#1 | 0.90   | 2.48     | 3.336(5) | 159    |
| N(8)-H(4)...O(15)   | 0.90   | 2.58     | 3.441(5) | 161    |
| N(9)-H(5)...O(3)#1  | 0.90   | 2.36     | 3.233(4) | 164    |
| N(9)-H(6)...O(12)#2 | 0.90   | 2.34     | 3.210(4) | 162    |
| N(10)-H(7)...N(6)   | 0.90   | 2.52     | 3.296(4) | 145    |
| N(10)-H(8)...S(2)#3 | 0.90   | 2.84     | 3.711(3) | 163    |

Symmetry transformations used to generate equivalent atoms:

#1  $x+1/2, -y+1/2, z+1/2$ ; #2  $x, y, z+1$ ; #3  $-x+1/2, y+1/2, -z+1/2$

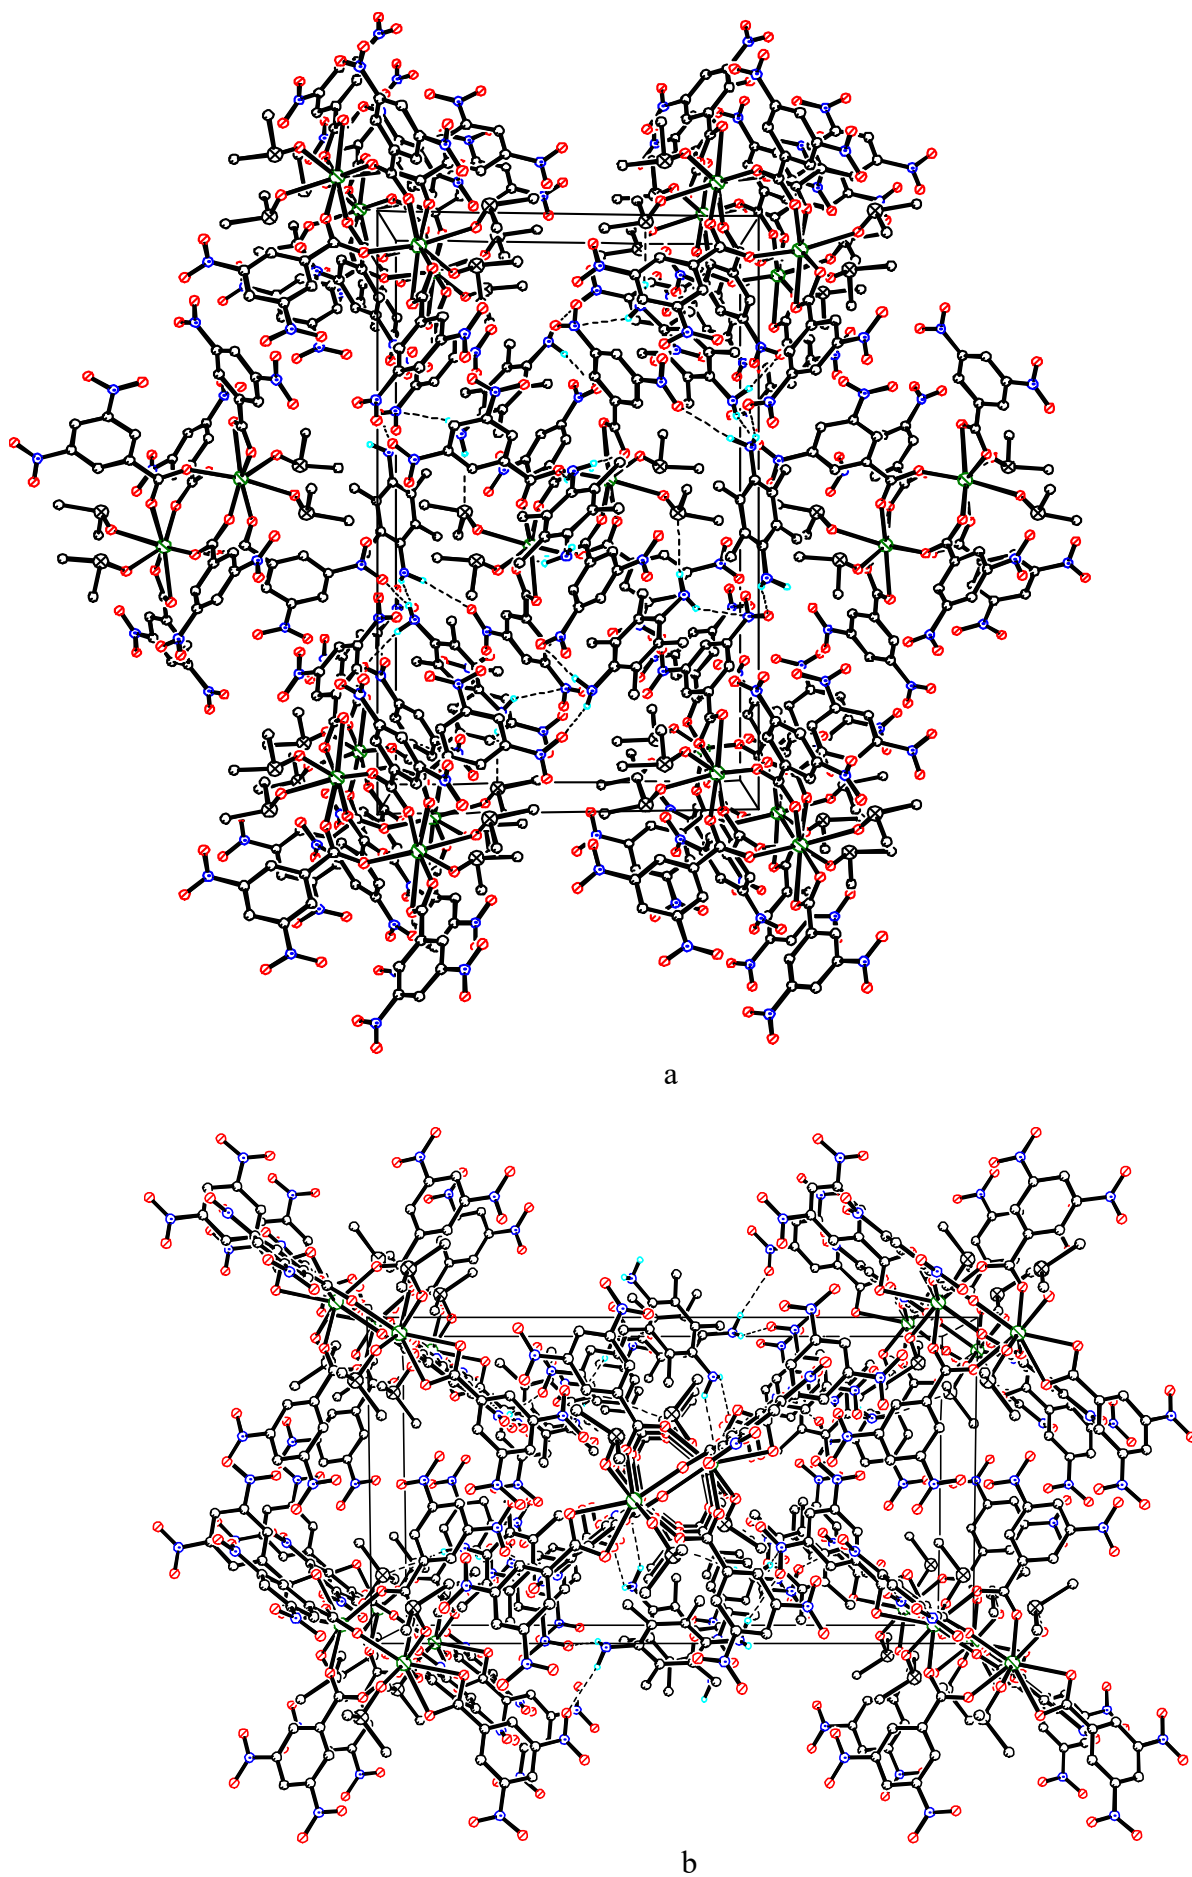

**Fig. S1.** Projection of the structure **3** along the axes x (a), z (b). Only the H atoms of NH<sub>2</sub> groups are shown for clarity.

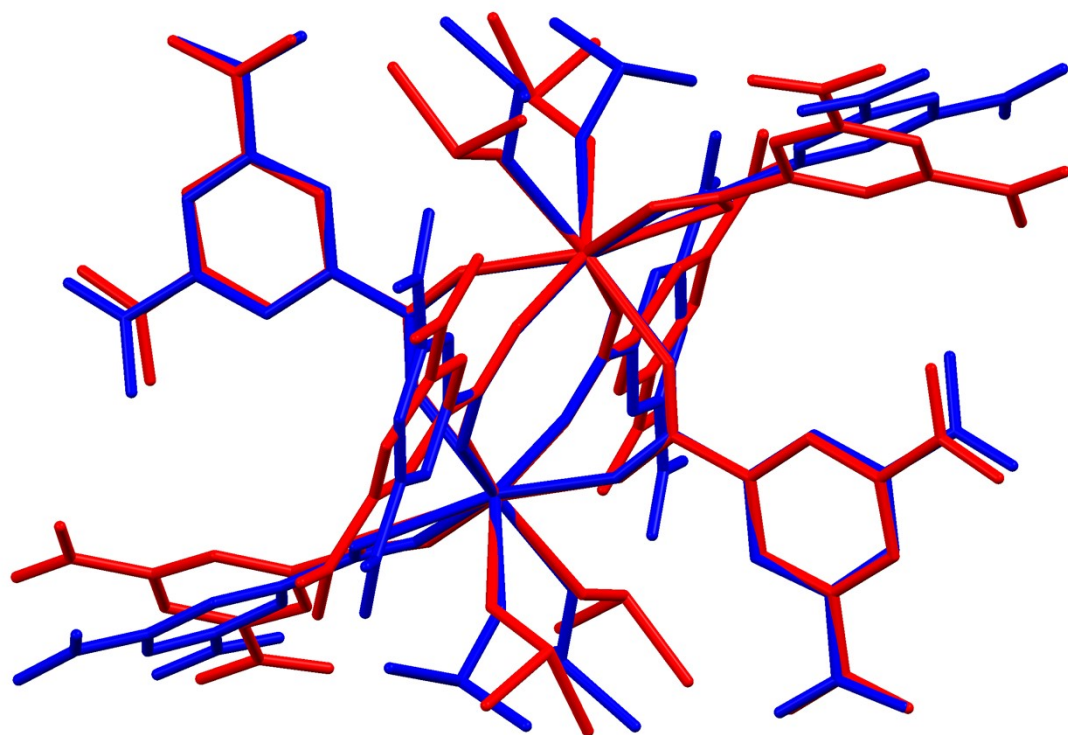

a

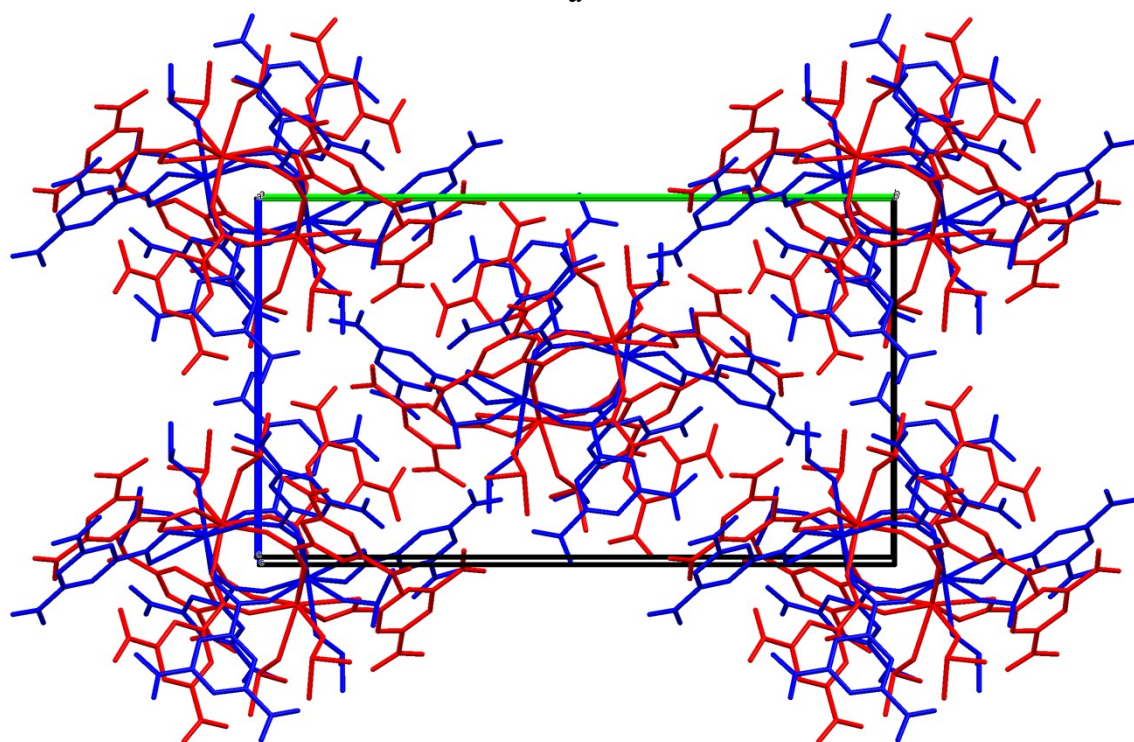

b

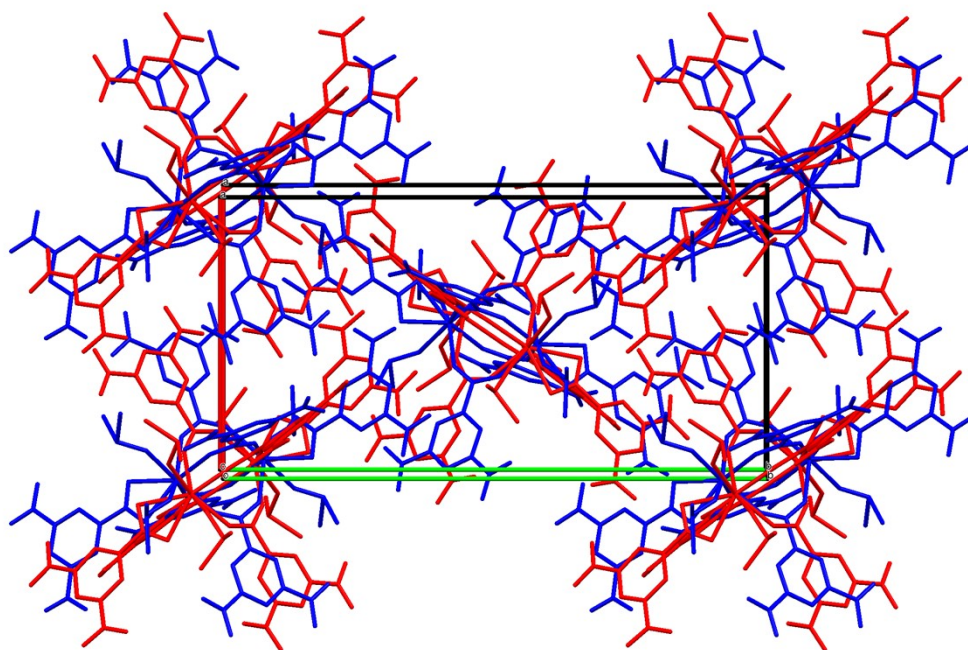

c

**Fig. S2.** Comparison of the structure of dimeric complexes in compounds  $[\text{Tb}_2(\text{O}_2\text{CC}_6\text{H}_3(\text{NO}_2)_2)_6(\text{DMSO})_4] \cdot 4\text{DAD}$  (**3**) and  $[\text{Tb}_2(\text{O}_2\text{CC}_6\text{H}_3(\text{NO}_2)_2)_6(\text{DMSO})_4] \cdot 3(\text{Me}_2\text{NPh})$  (a), and comparison of the crystal packings of the compounds; the projections along the axes b (b) and c (c).

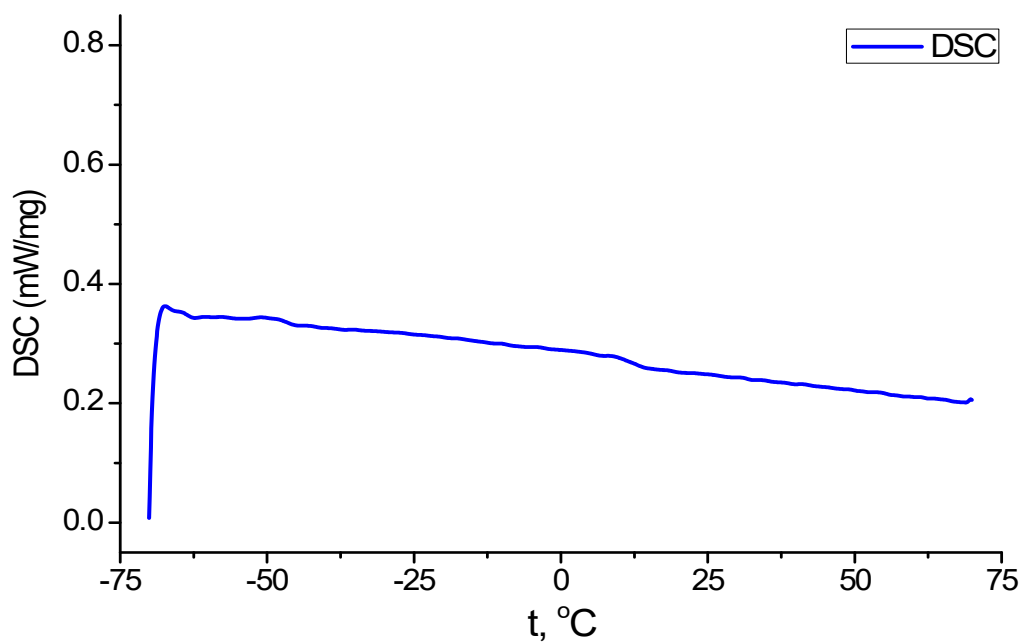

**Fig. S3.** DSC data for Gd complex **2** in -70 – 70 °C temperature range.

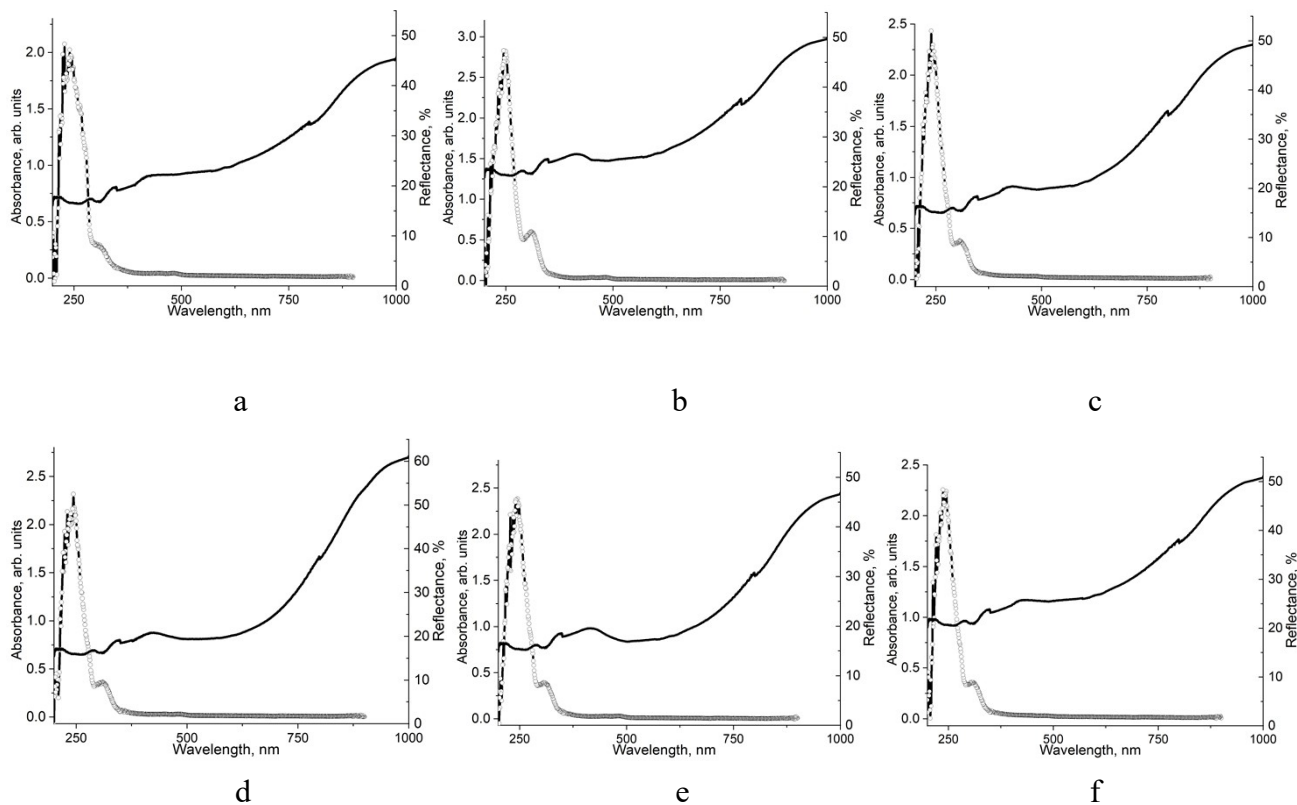

**Fig. S4.** Absorption UV-Vis spectra of  $10^{-4}$  M THF solutions (-o-) and reflectance spectra of the powder samples (solid lines) of complexes 1-6.

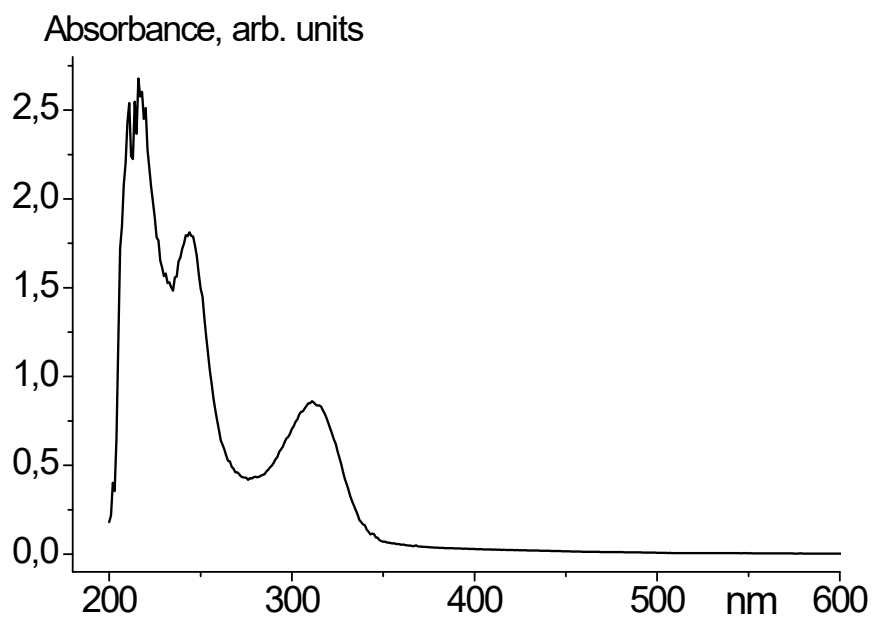

**Fig. S5.** Absorption UV-Vis spectrum of THF solution of DAD,  $2 \times 10^{-3}$  M



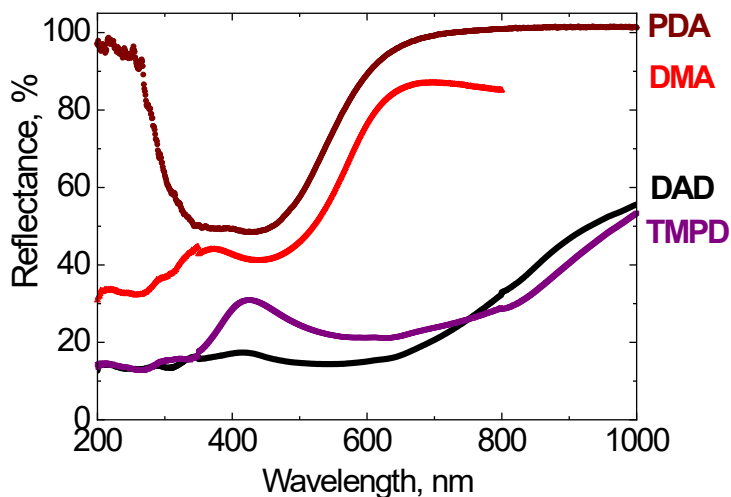

a

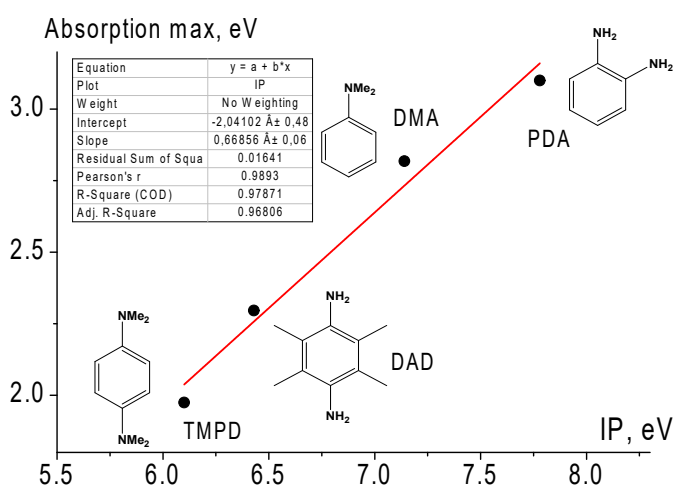

b

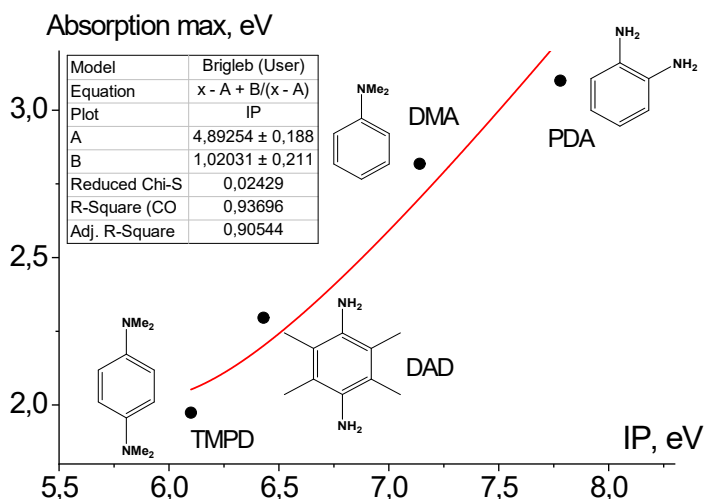

c

**Fig. S6.** Reflectance spectra of the solid-state samples of CT complexes of lanthanide 3,5-dinitrobenzoates with different donors (a) and correlation between the ionization potentials and the reflectance minima for the complexes with different electron donors obtained using the linear function (b) and using the hyperbolic formula given in the work [Brigleb, G. and Czekalla, J., *Z. Elektrochem.*, 1959, vol. 63, 1, p. 6-12] (c). The following relationship between wavelength and energy was used:  $h\nu = 1239.8 \lambda^{-1}$ .

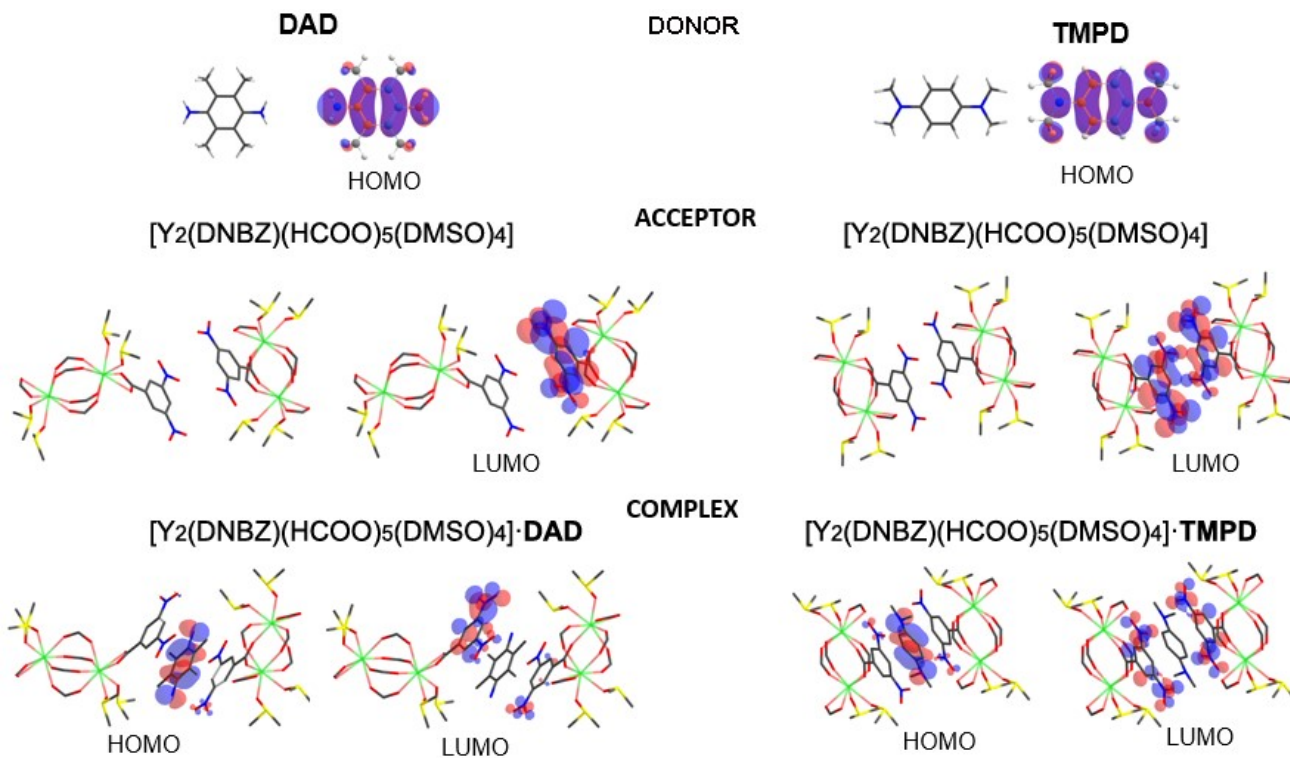

**Fig. S7.** Scheme of MO of donors (DAD, TMPD), DNBZ acceptors, and complexes.

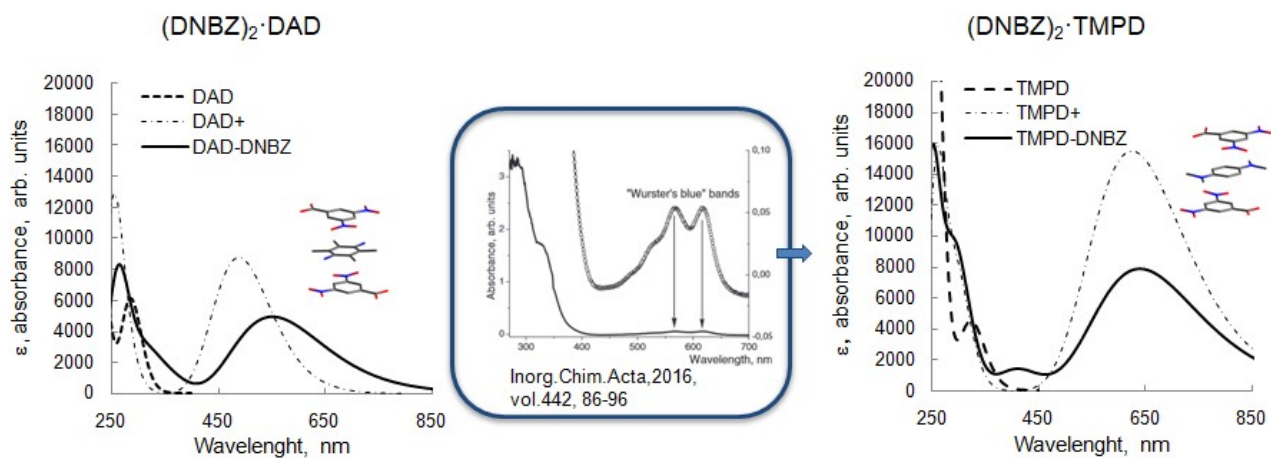

**Fig. S8.** Calculated UV-Vis spectra taking into account the solvent (THF) in the conductor-like polarizable continuum model (CPCM) model.

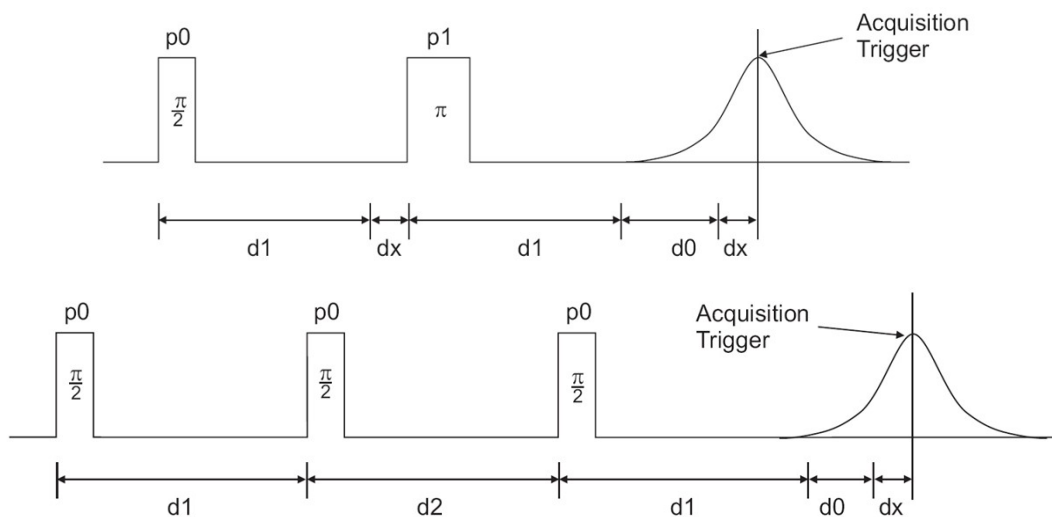

**Fig. S9.** 2-pulse (top) and 3-pulse (bottom) schemes for spin echo generating.

### ESEEM study details.

Several types of ESEEM experiments with different pulse sequences were employed, with appropriate phase cycling schemes to eliminate unwanted features from experimental echo envelopes. Among them are two pulse and 1D and 2D three- and four-pulse sequences. In the two-pulse electron spin echo (ESE) experiment ( $\pi/2$ - $\tau$ - $\pi$ - $\tau$ -echo), intensity of the echo signal at a fixed interval,  $\tau$ , between two microwave pulses with spin vector rotation angles  $\pi/2$  and  $\pi$  is measured as a function of magnetic field. In the 1D three-pulse experiment ( $\pi/2$ - $\tau$ - $\pi/2$ - $T$ - $\pi/2$ - $\tau$ -echo), the intensity of the stimulated echo signal after the third pulse is recorded as a function of time,  $T$ , at constant time,  $\tau$ . The set of three-pulse envelopes recorded at different  $\tau$  values form a 2D three-pulse data set. In the 1D four-pulse experiment ( $\pi/2$ - $\tau$ - $\pi/2$ - $t_1$ - $\pi$ - $t_2$ - $\pi/2$ - $\tau$ -echo), the intensity of the stimulated echo after the fourth pulse was measured with variation of  $t_2$  and  $t_1$  whilst  $\tau$  remained constant. The length of a  $\pi/2$  pulse was nominally 16 ns and a  $\pi$  pulse – 32 ns. The repetition rate of pulse sequences was 1000 Hz. For the 2D HYSCORE X-band spectra, the pulsed echo amplitude was measured using the sequence  $\pi/2$ - $\tau$ - $\pi/2$ - $t_1$ - $\pi$ - $t_2$ - $\pi/2$ - $\tau$ -echo with an  $\tau$  value of 136/200 ns and an 40/44 ns detector gate width (centered at the maximum of the echo signal); the delays were defined as the differences in the starting points of the pulses.<sup>1</sup> The echo intensity was measured as a function of  $t_1$  and  $t_2$ , where  $t_1$  and  $t_2$  were incremented in steps of 20 ns or 32 ns from their initial values of 88 ns or 100 ns, respectively. Equal amplitude pulses of 16 ns for  $\pi/2$  and 32 ns for  $\pi$  were used to record a 256×256 matrix. The 16 ns time difference between the initial values of  $t_1$  and  $t_2$  and  $\pi/2$  and  $\pi$  were set equal to obtain more symmetric spectra. In Q-band experiments, equal amplitude pulses of 8 ns for  $\pi/2$  and 16 ns for  $\pi$  were used. The unwanted echoes and anti-echoes were eliminated by applying a 4-step or 8-step phase cycling procedure.<sup>2</sup>

For the 2D HYSCORE data, a low-order polynomial baseline correction and tapering with a Hamming (Hanning and cosine) function was used to remove the unwanted echo decay. Before the application of a 2D Fourier (forward) transform, the data was zero filled to a 1024×1024 matrix, and the 2D HYSCORE spectral contour plots were created using Matlab R2021a.

[1] A. Schweiger and Jeschke, G. Principles of Pulse Electron Paramagnetic Resonance, Oxford University Press, Oxford, 2001.

[2] C. Gemperle, G. Aebli, A. Schweiger, and R. R. Ernst, Phase cycling in pulse EPR, *J. Magn. Reson.*, 1990, **88**, 241-256.

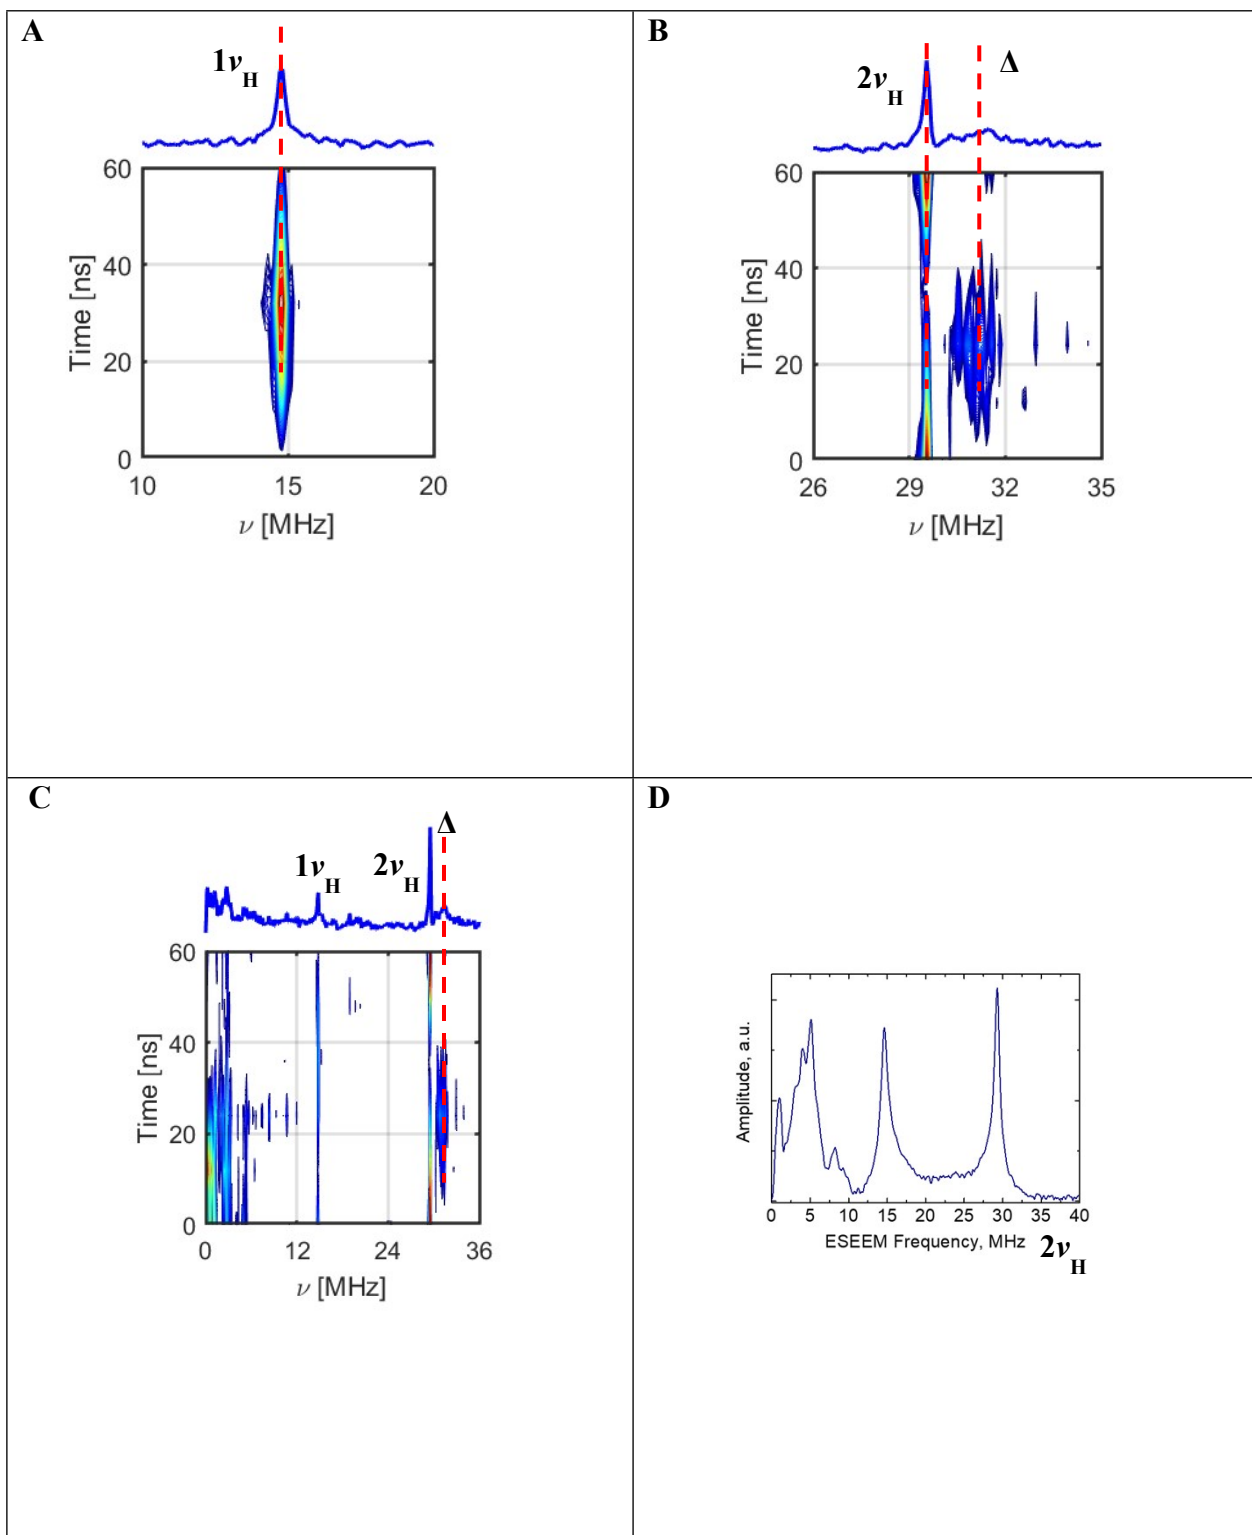

**Fig. S10.** Contour peaks of four-pulse 2D ESEEM sum combinations spectra of complex 7 (347.9 mT, step 12 ns,  $\tau = 100$  ns, 9.7284 GHz, 12 K). **A)** The narrow range shows  $1\nu_H$  peak (the single-quantum transition) in the interval of 14.5 - 15.5 MHz. **B)** There is a significant anisotropic hyperfine coupling for the protons contributing to the contour lines shifted from  $2\nu_H$  peak (the double-quantum) at  $\sim 29.5$  MHz. The relative intensity of the  $2\nu_H$  peak and shifted peaks do not change at different pulse delay  $t$  time, indicating a similar distribution of the protons in the complex 7 environment. **C)** The broad range is displayed in the frequency interval of 0 - 36 MHz. **D)** Two-pulse 1D ESEEM is comparable to spectra side-by-side (Fig. 7 in the main text, just comparing).

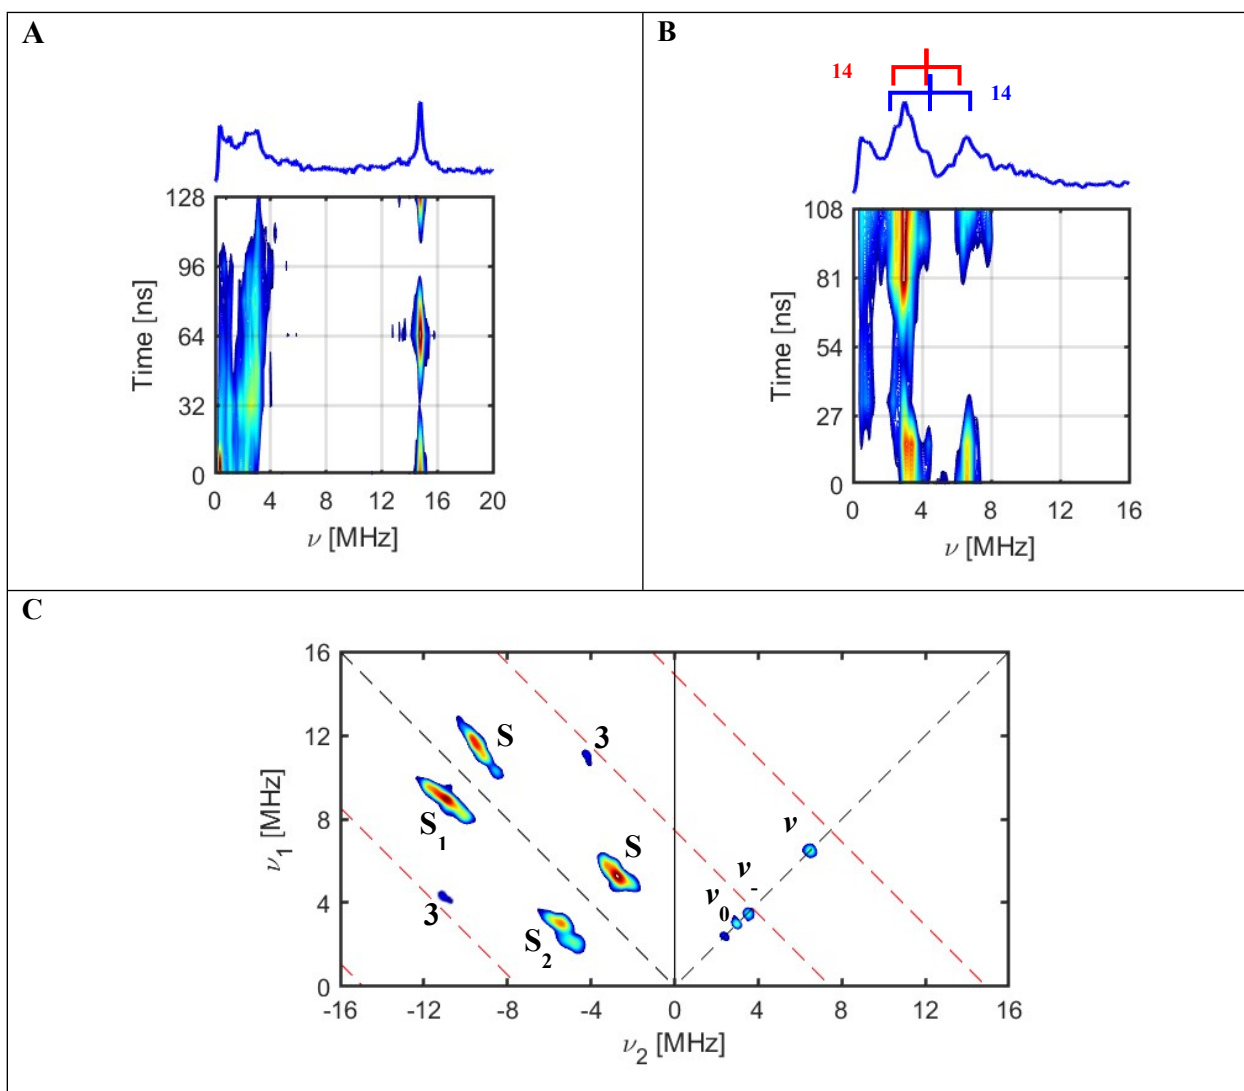

**Fig. S11.** Contour representations of 2D ESEEM spectra of complex 7. **A)** Three-pulse 2D ESEEM spectrum collected at 16 K (X-band, 9.7284 GHz, 347.9 mT,  $\tau = 100$  ns). Nuclear quadrupole transition peaks strongly overlap in the region of 0.3 - 4.3 MHz, while Larmor frequency peak of protons is at  $\sim 15$  MHz. **B)** Three-pulse 2D ESEEM spectrum at 298 K (Q-band, 33.9697 GHz, 1211.4 mT,  $\tau = 100$  ns). Nuclear quadrupole transition peaks are now overlapped in the region of 1.0 - 8.5 MHz. **C)** 2D HYSCORE spectrum at 298 K (Q-band, 33.9697 GHz, 1211.4 mT,  $\tau = 136$  ns, step 32 ns). In (+,+) quadrant, three transition frequencies of  $^{14}\text{N}$  quadrupole interactions are also overlapped. In (-,+) quadrant, the correlation peaks of single-quantum transitions of two-coupled  $^{14}\text{N}$  nuclei are partially resolved. Red dashed lines represent the single- and double-quantum transitions of coupled  $^{14}\text{N}$  nuclei.

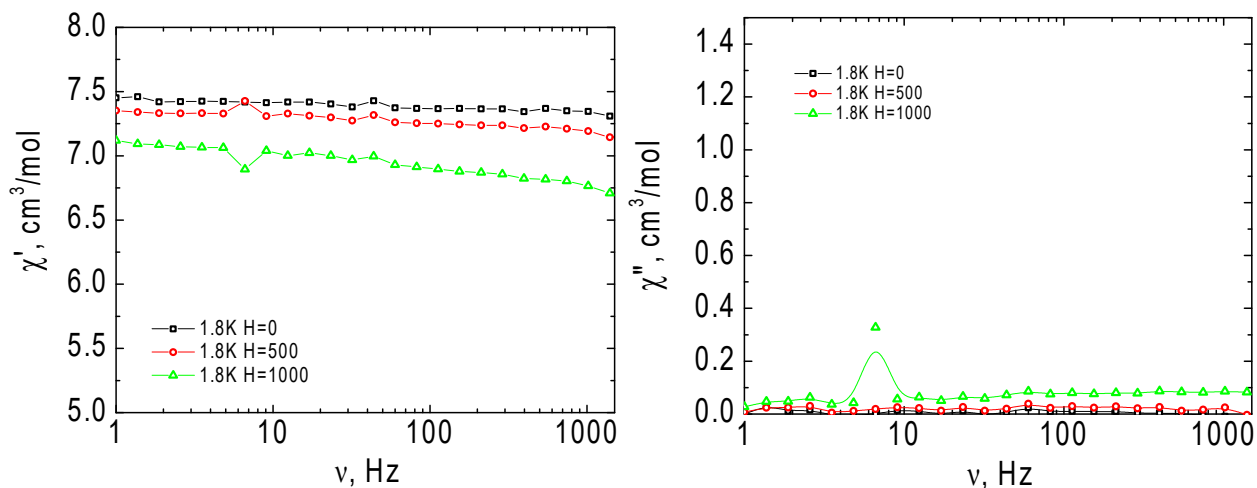

**Fig. S12.** Frequency dependencies of the in-phase (left) and out-of-phase (right) ac-magnetic susceptibility for complex **3** (Tb) at 1.8 K taken under 0 (black), 500 (red), and 1000 Oe (green) dc-field. Solid lines are visual guides.

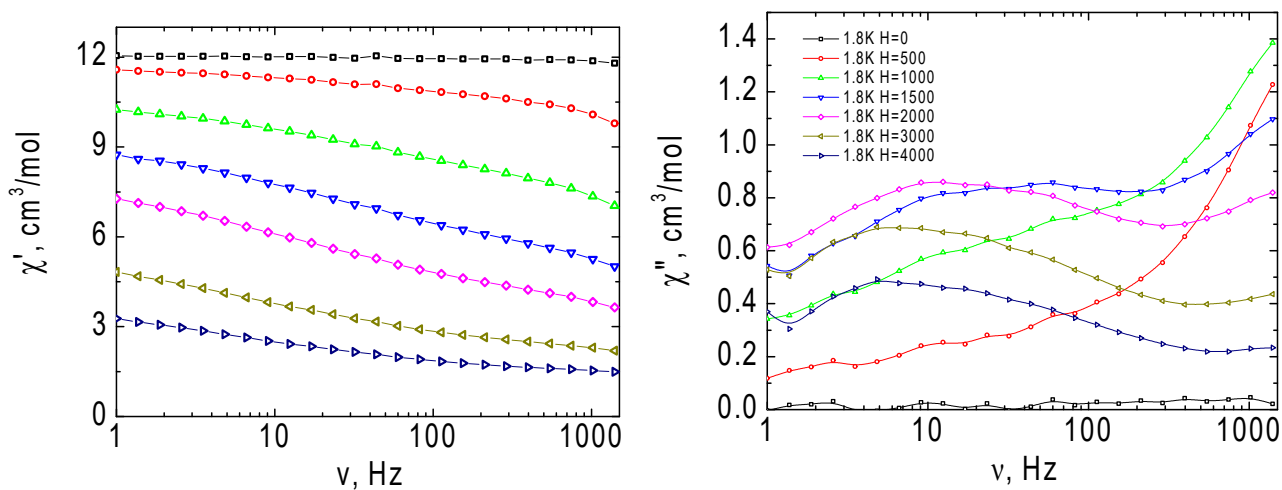

**Fig. S13.** Frequency dependencies of the in-phase (left) and out-of-phase (right) ac-magnetic susceptibility for complex **4** (Dy) at 1.8 K taken under different dc-fields. Solid lines are visual guides.

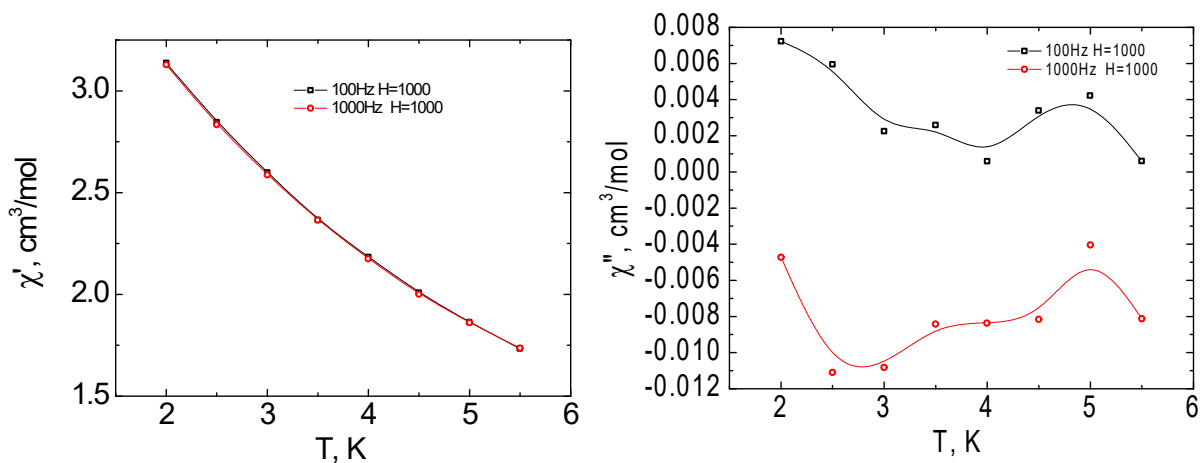

**Fig. S14.** Temperature dependencies of the in-phase (left) and out-of-phase (right) ac-magnetic susceptibility for complex **5** (Ho) in the 2-5.5 K range under 1000 Oe *dc*-field. Solid lines are visual guides.

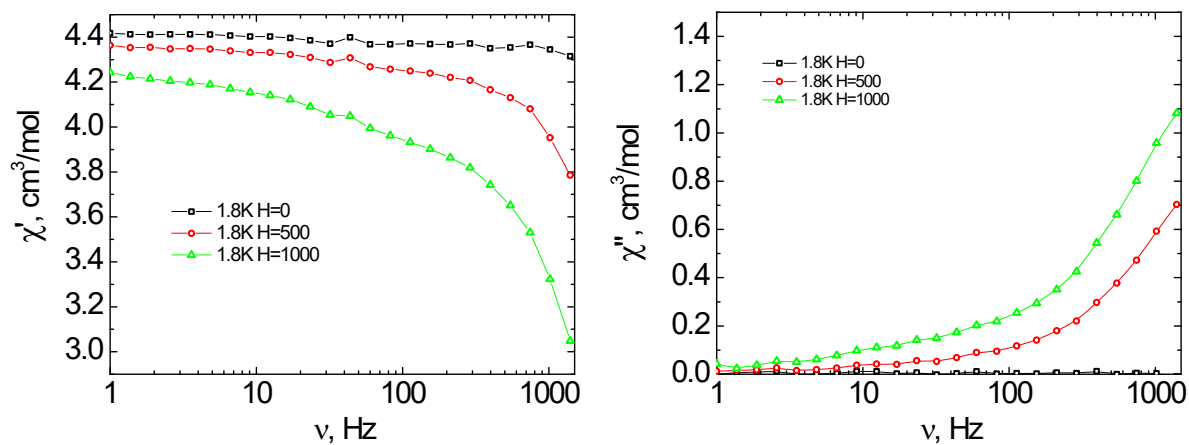

**Fig. S15.** Frequency dependencies of the in-phase (left) and out-of-phase (right) ac-magnetic susceptibility for complex **6** (Er) at 1.8 K taken under different *dc*-fields. Solid lines are visual guides.



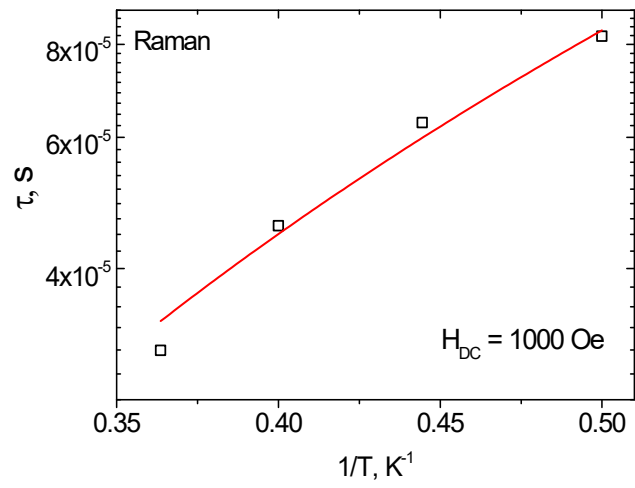

a

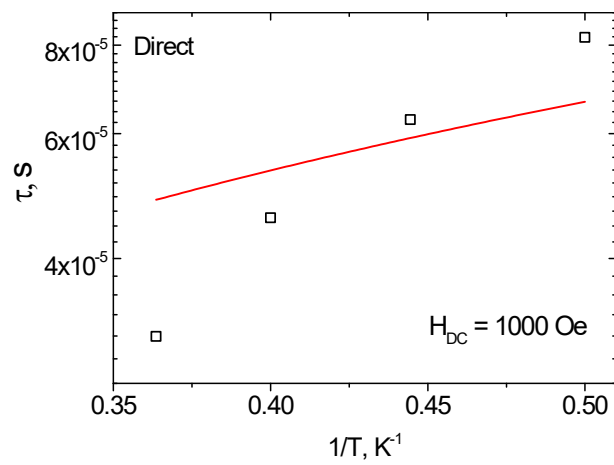

b

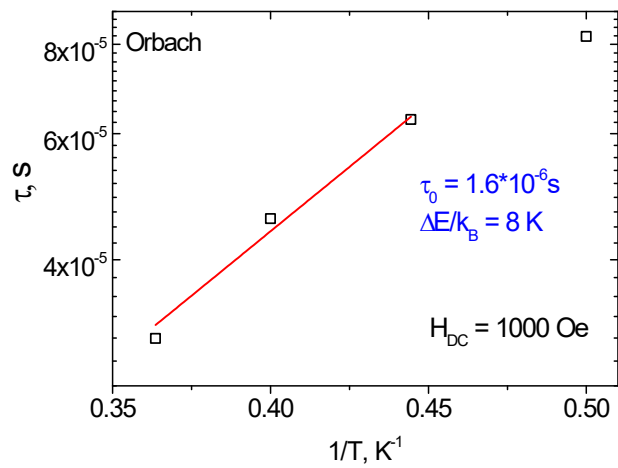

c

**Fig. S16.** The  $\tau$  vs.  $T^{-1}$  plot for **4** in  $1000 \text{ Oe}$   $dc$ -field. The red lines represent the best fits using Orbach (a), Raman (b), and direct (c) mechanisms.

**Table S4.** Fitting of the  $\tau$  vs.  $1/T$  dependences for complex 4.

| Dependence of the relaxation time $\tau$ on the reciprocal temperature for complex 4 ( $H = 1.0$ kOe, $T = 2.00$ - $2.75$ K).                                                                                                                                                                                                                                                                                                                                                                                                                                                                                                                                                                                                                                                                                                                                                                                                                                                                                                                                                                                                                                                                                         | Fit function, temperature range, and the best-fit parameters with uncertainties.                                                                                                                                                                                                                                                                                                                                                                                                                                                                                                                                                                                                                                                                                                          |                |              |               |                                                             |                                                            |                 |                 |             |               |               |         |          |          |                |                |            |            |            |          |          |           |          |                               |                                                                                                                                                                                                                                                                                                                                                                                                                                                                        |                                                                                                                                                                                                                                                                                                                                                                                                                                                                                                                                                                                                 |             |  |               |         |  |          |       |                |   |          |            |   |         |         |                                                                                                                                                                                                                                                                                                                                                                                                                                                                                                                                                                                                                                                                                                                      |
|-----------------------------------------------------------------------------------------------------------------------------------------------------------------------------------------------------------------------------------------------------------------------------------------------------------------------------------------------------------------------------------------------------------------------------------------------------------------------------------------------------------------------------------------------------------------------------------------------------------------------------------------------------------------------------------------------------------------------------------------------------------------------------------------------------------------------------------------------------------------------------------------------------------------------------------------------------------------------------------------------------------------------------------------------------------------------------------------------------------------------------------------------------------------------------------------------------------------------|-------------------------------------------------------------------------------------------------------------------------------------------------------------------------------------------------------------------------------------------------------------------------------------------------------------------------------------------------------------------------------------------------------------------------------------------------------------------------------------------------------------------------------------------------------------------------------------------------------------------------------------------------------------------------------------------------------------------------------------------------------------------------------------------|----------------|--------------|---------------|-------------------------------------------------------------|------------------------------------------------------------|-----------------|-----------------|-------------|---------------|---------------|---------|----------|----------|----------------|----------------|------------|------------|------------|----------|----------|-----------|----------|-------------------------------|------------------------------------------------------------------------------------------------------------------------------------------------------------------------------------------------------------------------------------------------------------------------------------------------------------------------------------------------------------------------------------------------------------------------------------------------------------------------|-------------------------------------------------------------------------------------------------------------------------------------------------------------------------------------------------------------------------------------------------------------------------------------------------------------------------------------------------------------------------------------------------------------------------------------------------------------------------------------------------------------------------------------------------------------------------------------------------|-------------|--|---------------|---------|--|----------|-------|----------------|---|----------|------------|---|---------|---------|----------------------------------------------------------------------------------------------------------------------------------------------------------------------------------------------------------------------------------------------------------------------------------------------------------------------------------------------------------------------------------------------------------------------------------------------------------------------------------------------------------------------------------------------------------------------------------------------------------------------------------------------------------------------------------------------------------------------|
| 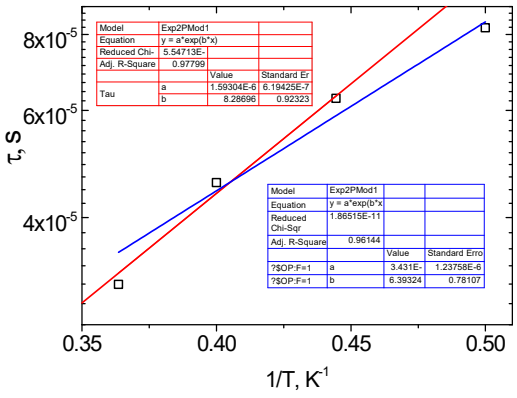 <table border="1" data-bbox="279 324 502 414"> <thead> <tr> <th colspan="2">Model</th> <th>Exp2PMod1</th> </tr> </thead> <tbody> <tr> <td>Equation</td> <td colspan="2"><math>y = a \cdot \exp(b \cdot x)</math></td> </tr> <tr> <td>Reduced Chi-Sqr</td> <td colspan="2">5.54713E-11</td> </tr> <tr> <td>Adj. R-Square</td> <td colspan="2">0.97799</td> </tr> <tr> <td rowspan="3">Tau</td> <td>Value</td> <td>Standard Error</td> </tr> <tr> <td>a</td> <td>6.19425E-7</td> </tr> <tr> <td>b</td> <td>8.28696</td> </tr> </tbody> </table> <table border="1" data-bbox="446 481 670 593"> <thead> <tr> <th colspan="2">Model</th> <th>Exp2PMod1</th> </tr> </thead> <tbody> <tr> <td>Equation</td> <td colspan="2"><math>y = a \cdot \exp(b \cdot x)</math></td> </tr> <tr> <td>Reduced Chi-Sqr</td> <td colspan="2">1.86515E-11</td> </tr> <tr> <td>Adj. R-Square</td> <td colspan="2">0.96144</td> </tr> <tr> <td rowspan="4">7SOP-F=1</td> <td>Value</td> <td>Standard Error</td> </tr> <tr> <td>a</td> <td>3.431E-6</td> <td>1.23755E-6</td> </tr> <tr> <td>b</td> <td>6.39324</td> <td>0.76107</td> </tr> </tbody> </table> | Model                                                                                                                                                                                                                                                                                                                                                                                                                                                                                                                                                                                                                                                                                                                                                                                     |                | Exp2PMod1    | Equation      | $y = a \cdot \exp(b \cdot x)$                               |                                                            | Reduced Chi-Sqr | 5.54713E-11     |             | Adj. R-Square | 0.97799       |         | Tau      | Value    | Standard Error | a              | 6.19425E-7 | b          | 8.28696    | Model    |          | Exp2PMod1 | Equation | $y = a \cdot \exp(b \cdot x)$ |                                                                                                                                                                                                                                                                                                                                                                                                                                                                        | Reduced Chi-Sqr                                                                                                                                                                                                                                                                                                                                                                                                                                                                                                                                                                                 | 1.86515E-11 |  | Adj. R-Square | 0.96144 |  | 7SOP-F=1 | Value | Standard Error | a | 3.431E-6 | 1.23755E-6 | b | 6.39324 | 0.76107 | <p><b>Orbach</b><br/> <math>\tau = \tau_0 \cdot \exp(\Delta E/kT)</math></p> <p><math>T = 2.25</math>-<math>2.75</math> K<br/> <math>\Delta E/k = 8.3 \pm 0.9</math> K<br/> <math>\tau_0 = 1.6 \cdot 10^{-6} \pm 6.2 \cdot 10^{-7}</math> s<br/> <math>R^2 = 0.9780</math> (red line)</p> <p><math>T = 2.00</math>-<math>2.75</math> K<br/> <math>\Delta E/k = 6.4 \pm 0.8</math> K<br/> <math>\tau_0 = 3.4 \cdot 10^{-6} \pm 1.2 \cdot 10^{-6}</math> s<br/> <math>R^2 = 0.9614</math> (blue line)</p> <p>The values of relaxation times characteristic of over-barrier one-phonon remagnetization corresponding to the Orbach mechanism should be in the range of <math>\sim 10^{-10} - 10^{-12}</math> s. [1]</p> |
| Model                                                                                                                                                                                                                                                                                                                                                                                                                                                                                                                                                                                                                                                                                                                                                                                                                                                                                                                                                                                                                                                                                                                                                                                                                 |                                                                                                                                                                                                                                                                                                                                                                                                                                                                                                                                                                                                                                                                                                                                                                                           | Exp2PMod1      |              |               |                                                             |                                                            |                 |                 |             |               |               |         |          |          |                |                |            |            |            |          |          |           |          |                               |                                                                                                                                                                                                                                                                                                                                                                                                                                                                        |                                                                                                                                                                                                                                                                                                                                                                                                                                                                                                                                                                                                 |             |  |               |         |  |          |       |                |   |          |            |   |         |         |                                                                                                                                                                                                                                                                                                                                                                                                                                                                                                                                                                                                                                                                                                                      |
| Equation                                                                                                                                                                                                                                                                                                                                                                                                                                                                                                                                                                                                                                                                                                                                                                                                                                                                                                                                                                                                                                                                                                                                                                                                              | $y = a \cdot \exp(b \cdot x)$                                                                                                                                                                                                                                                                                                                                                                                                                                                                                                                                                                                                                                                                                                                                                             |                |              |               |                                                             |                                                            |                 |                 |             |               |               |         |          |          |                |                |            |            |            |          |          |           |          |                               |                                                                                                                                                                                                                                                                                                                                                                                                                                                                        |                                                                                                                                                                                                                                                                                                                                                                                                                                                                                                                                                                                                 |             |  |               |         |  |          |       |                |   |          |            |   |         |         |                                                                                                                                                                                                                                                                                                                                                                                                                                                                                                                                                                                                                                                                                                                      |
| Reduced Chi-Sqr                                                                                                                                                                                                                                                                                                                                                                                                                                                                                                                                                                                                                                                                                                                                                                                                                                                                                                                                                                                                                                                                                                                                                                                                       | 5.54713E-11                                                                                                                                                                                                                                                                                                                                                                                                                                                                                                                                                                                                                                                                                                                                                                               |                |              |               |                                                             |                                                            |                 |                 |             |               |               |         |          |          |                |                |            |            |            |          |          |           |          |                               |                                                                                                                                                                                                                                                                                                                                                                                                                                                                        |                                                                                                                                                                                                                                                                                                                                                                                                                                                                                                                                                                                                 |             |  |               |         |  |          |       |                |   |          |            |   |         |         |                                                                                                                                                                                                                                                                                                                                                                                                                                                                                                                                                                                                                                                                                                                      |
| Adj. R-Square                                                                                                                                                                                                                                                                                                                                                                                                                                                                                                                                                                                                                                                                                                                                                                                                                                                                                                                                                                                                                                                                                                                                                                                                         | 0.97799                                                                                                                                                                                                                                                                                                                                                                                                                                                                                                                                                                                                                                                                                                                                                                                   |                |              |               |                                                             |                                                            |                 |                 |             |               |               |         |          |          |                |                |            |            |            |          |          |           |          |                               |                                                                                                                                                                                                                                                                                                                                                                                                                                                                        |                                                                                                                                                                                                                                                                                                                                                                                                                                                                                                                                                                                                 |             |  |               |         |  |          |       |                |   |          |            |   |         |         |                                                                                                                                                                                                                                                                                                                                                                                                                                                                                                                                                                                                                                                                                                                      |
| Tau                                                                                                                                                                                                                                                                                                                                                                                                                                                                                                                                                                                                                                                                                                                                                                                                                                                                                                                                                                                                                                                                                                                                                                                                                   | Value                                                                                                                                                                                                                                                                                                                                                                                                                                                                                                                                                                                                                                                                                                                                                                                     | Standard Error |              |               |                                                             |                                                            |                 |                 |             |               |               |         |          |          |                |                |            |            |            |          |          |           |          |                               |                                                                                                                                                                                                                                                                                                                                                                                                                                                                        |                                                                                                                                                                                                                                                                                                                                                                                                                                                                                                                                                                                                 |             |  |               |         |  |          |       |                |   |          |            |   |         |         |                                                                                                                                                                                                                                                                                                                                                                                                                                                                                                                                                                                                                                                                                                                      |
|                                                                                                                                                                                                                                                                                                                                                                                                                                                                                                                                                                                                                                                                                                                                                                                                                                                                                                                                                                                                                                                                                                                                                                                                                       | a                                                                                                                                                                                                                                                                                                                                                                                                                                                                                                                                                                                                                                                                                                                                                                                         | 6.19425E-7     |              |               |                                                             |                                                            |                 |                 |             |               |               |         |          |          |                |                |            |            |            |          |          |           |          |                               |                                                                                                                                                                                                                                                                                                                                                                                                                                                                        |                                                                                                                                                                                                                                                                                                                                                                                                                                                                                                                                                                                                 |             |  |               |         |  |          |       |                |   |          |            |   |         |         |                                                                                                                                                                                                                                                                                                                                                                                                                                                                                                                                                                                                                                                                                                                      |
|                                                                                                                                                                                                                                                                                                                                                                                                                                                                                                                                                                                                                                                                                                                                                                                                                                                                                                                                                                                                                                                                                                                                                                                                                       | b                                                                                                                                                                                                                                                                                                                                                                                                                                                                                                                                                                                                                                                                                                                                                                                         | 8.28696        |              |               |                                                             |                                                            |                 |                 |             |               |               |         |          |          |                |                |            |            |            |          |          |           |          |                               |                                                                                                                                                                                                                                                                                                                                                                                                                                                                        |                                                                                                                                                                                                                                                                                                                                                                                                                                                                                                                                                                                                 |             |  |               |         |  |          |       |                |   |          |            |   |         |         |                                                                                                                                                                                                                                                                                                                                                                                                                                                                                                                                                                                                                                                                                                                      |
| Model                                                                                                                                                                                                                                                                                                                                                                                                                                                                                                                                                                                                                                                                                                                                                                                                                                                                                                                                                                                                                                                                                                                                                                                                                 |                                                                                                                                                                                                                                                                                                                                                                                                                                                                                                                                                                                                                                                                                                                                                                                           | Exp2PMod1      |              |               |                                                             |                                                            |                 |                 |             |               |               |         |          |          |                |                |            |            |            |          |          |           |          |                               |                                                                                                                                                                                                                                                                                                                                                                                                                                                                        |                                                                                                                                                                                                                                                                                                                                                                                                                                                                                                                                                                                                 |             |  |               |         |  |          |       |                |   |          |            |   |         |         |                                                                                                                                                                                                                                                                                                                                                                                                                                                                                                                                                                                                                                                                                                                      |
| Equation                                                                                                                                                                                                                                                                                                                                                                                                                                                                                                                                                                                                                                                                                                                                                                                                                                                                                                                                                                                                                                                                                                                                                                                                              | $y = a \cdot \exp(b \cdot x)$                                                                                                                                                                                                                                                                                                                                                                                                                                                                                                                                                                                                                                                                                                                                                             |                |              |               |                                                             |                                                            |                 |                 |             |               |               |         |          |          |                |                |            |            |            |          |          |           |          |                               |                                                                                                                                                                                                                                                                                                                                                                                                                                                                        |                                                                                                                                                                                                                                                                                                                                                                                                                                                                                                                                                                                                 |             |  |               |         |  |          |       |                |   |          |            |   |         |         |                                                                                                                                                                                                                                                                                                                                                                                                                                                                                                                                                                                                                                                                                                                      |
| Reduced Chi-Sqr                                                                                                                                                                                                                                                                                                                                                                                                                                                                                                                                                                                                                                                                                                                                                                                                                                                                                                                                                                                                                                                                                                                                                                                                       | 1.86515E-11                                                                                                                                                                                                                                                                                                                                                                                                                                                                                                                                                                                                                                                                                                                                                                               |                |              |               |                                                             |                                                            |                 |                 |             |               |               |         |          |          |                |                |            |            |            |          |          |           |          |                               |                                                                                                                                                                                                                                                                                                                                                                                                                                                                        |                                                                                                                                                                                                                                                                                                                                                                                                                                                                                                                                                                                                 |             |  |               |         |  |          |       |                |   |          |            |   |         |         |                                                                                                                                                                                                                                                                                                                                                                                                                                                                                                                                                                                                                                                                                                                      |
| Adj. R-Square                                                                                                                                                                                                                                                                                                                                                                                                                                                                                                                                                                                                                                                                                                                                                                                                                                                                                                                                                                                                                                                                                                                                                                                                         | 0.96144                                                                                                                                                                                                                                                                                                                                                                                                                                                                                                                                                                                                                                                                                                                                                                                   |                |              |               |                                                             |                                                            |                 |                 |             |               |               |         |          |          |                |                |            |            |            |          |          |           |          |                               |                                                                                                                                                                                                                                                                                                                                                                                                                                                                        |                                                                                                                                                                                                                                                                                                                                                                                                                                                                                                                                                                                                 |             |  |               |         |  |          |       |                |   |          |            |   |         |         |                                                                                                                                                                                                                                                                                                                                                                                                                                                                                                                                                                                                                                                                                                                      |
| 7SOP-F=1                                                                                                                                                                                                                                                                                                                                                                                                                                                                                                                                                                                                                                                                                                                                                                                                                                                                                                                                                                                                                                                                                                                                                                                                              | Value                                                                                                                                                                                                                                                                                                                                                                                                                                                                                                                                                                                                                                                                                                                                                                                     | Standard Error |              |               |                                                             |                                                            |                 |                 |             |               |               |         |          |          |                |                |            |            |            |          |          |           |          |                               |                                                                                                                                                                                                                                                                                                                                                                                                                                                                        |                                                                                                                                                                                                                                                                                                                                                                                                                                                                                                                                                                                                 |             |  |               |         |  |          |       |                |   |          |            |   |         |         |                                                                                                                                                                                                                                                                                                                                                                                                                                                                                                                                                                                                                                                                                                                      |
|                                                                                                                                                                                                                                                                                                                                                                                                                                                                                                                                                                                                                                                                                                                                                                                                                                                                                                                                                                                                                                                                                                                                                                                                                       | a                                                                                                                                                                                                                                                                                                                                                                                                                                                                                                                                                                                                                                                                                                                                                                                         | 3.431E-6       | 1.23755E-6   |               |                                                             |                                                            |                 |                 |             |               |               |         |          |          |                |                |            |            |            |          |          |           |          |                               |                                                                                                                                                                                                                                                                                                                                                                                                                                                                        |                                                                                                                                                                                                                                                                                                                                                                                                                                                                                                                                                                                                 |             |  |               |         |  |          |       |                |   |          |            |   |         |         |                                                                                                                                                                                                                                                                                                                                                                                                                                                                                                                                                                                                                                                                                                                      |
|                                                                                                                                                                                                                                                                                                                                                                                                                                                                                                                                                                                                                                                                                                                                                                                                                                                                                                                                                                                                                                                                                                                                                                                                                       | b                                                                                                                                                                                                                                                                                                                                                                                                                                                                                                                                                                                                                                                                                                                                                                                         | 6.39324        | 0.76107      |               |                                                             |                                                            |                 |                 |             |               |               |         |          |          |                |                |            |            |            |          |          |           |          |                               |                                                                                                                                                                                                                                                                                                                                                                                                                                                                        |                                                                                                                                                                                                                                                                                                                                                                                                                                                                                                                                                                                                 |             |  |               |         |  |          |       |                |   |          |            |   |         |         |                                                                                                                                                                                                                                                                                                                                                                                                                                                                                                                                                                                                                                                                                                                      |
|                                                                                                                                                                                                                                                                                                                                                                                                                                                                                                                                                                                                                                                                                                                                                                                                                                                                                                                                                                                                                                                                                                                                                                                                                       |  <table border="1" data-bbox="438 1041 694 1187"> <thead> <tr> <th colspan="2">Model</th> <th>Orbach (User)</th> </tr> </thead> <tbody> <tr> <td>Equation</td> <td colspan="2"><math>1/(\tau_0 \cdot (1 - \exp(-\Delta E/kT)) + \text{const})</math></td> </tr> <tr> <td>Reduced Chi-Sqr</td> <td colspan="2">5.24356E-13</td> </tr> <tr> <td>Adj. R-Square</td> <td colspan="2">0.99892</td> </tr> <tr> <td rowspan="4">7SOP-F=1</td> <td>Value</td> <td>Standard Error</td> </tr> <tr> <td>tau0</td> <td>1.44152E-7</td> <td>6.07017E-8</td> </tr> <tr> <td>dE_div_k</td> <td>15.78877</td> <td>1.13906</td> </tr> <tr> <td>const</td> <td>9617.39875</td> <td>436.57805</td> </tr> </tbody> </table> | Model          |              | Orbach (User) | Equation                                                    | $1/(\tau_0 \cdot (1 - \exp(-\Delta E/kT)) + \text{const})$ |                 | Reduced Chi-Sqr | 5.24356E-13 |               | Adj. R-Square | 0.99892 |          | 7SOP-F=1 | Value          | Standard Error | tau0       | 1.44152E-7 | 6.07017E-8 | dE_div_k | 15.78877 | 1.13906   | const    | 9617.39875                    | 436.57805                                                                                                                                                                                                                                                                                                                                                                                                                                                              | <p><b>Orbach+ QTM</b><br/> <math>\tau^{-1} = \tau_0^{-1} \cdot \exp(-\Delta E/kT) + B</math></p> <p><math>\Delta E/k = 15.8 \pm 1.1</math> K<br/> <math>\tau_0 = 1.4 \cdot 10^{-7} \pm 6.1 \cdot 10^{-8}</math> s<br/> <math>B = 9617 \pm 436</math> s<math>^{-1}</math><br/> <math>R^2 = 0.9989</math></p> <p>The values of relaxation times characteristic of over-barrier one-phonon remagnetization corresponding to the Orbach mechanism should be in the range of <math>\sim 10^{-10} - 10^{-12}</math> s. One of the most adequate parameter values from physical point of view. [1]</p> |             |  |               |         |  |          |       |                |   |          |            |   |         |         |                                                                                                                                                                                                                                                                                                                                                                                                                                                                                                                                                                                                                                                                                                                      |
| Model                                                                                                                                                                                                                                                                                                                                                                                                                                                                                                                                                                                                                                                                                                                                                                                                                                                                                                                                                                                                                                                                                                                                                                                                                 |                                                                                                                                                                                                                                                                                                                                                                                                                                                                                                                                                                                                                                                                                                                                                                                           | Orbach (User)  |              |               |                                                             |                                                            |                 |                 |             |               |               |         |          |          |                |                |            |            |            |          |          |           |          |                               |                                                                                                                                                                                                                                                                                                                                                                                                                                                                        |                                                                                                                                                                                                                                                                                                                                                                                                                                                                                                                                                                                                 |             |  |               |         |  |          |       |                |   |          |            |   |         |         |                                                                                                                                                                                                                                                                                                                                                                                                                                                                                                                                                                                                                                                                                                                      |
| Equation                                                                                                                                                                                                                                                                                                                                                                                                                                                                                                                                                                                                                                                                                                                                                                                                                                                                                                                                                                                                                                                                                                                                                                                                              | $1/(\tau_0 \cdot (1 - \exp(-\Delta E/kT)) + \text{const})$                                                                                                                                                                                                                                                                                                                                                                                                                                                                                                                                                                                                                                                                                                                                |                |              |               |                                                             |                                                            |                 |                 |             |               |               |         |          |          |                |                |            |            |            |          |          |           |          |                               |                                                                                                                                                                                                                                                                                                                                                                                                                                                                        |                                                                                                                                                                                                                                                                                                                                                                                                                                                                                                                                                                                                 |             |  |               |         |  |          |       |                |   |          |            |   |         |         |                                                                                                                                                                                                                                                                                                                                                                                                                                                                                                                                                                                                                                                                                                                      |
| Reduced Chi-Sqr                                                                                                                                                                                                                                                                                                                                                                                                                                                                                                                                                                                                                                                                                                                                                                                                                                                                                                                                                                                                                                                                                                                                                                                                       | 5.24356E-13                                                                                                                                                                                                                                                                                                                                                                                                                                                                                                                                                                                                                                                                                                                                                                               |                |              |               |                                                             |                                                            |                 |                 |             |               |               |         |          |          |                |                |            |            |            |          |          |           |          |                               |                                                                                                                                                                                                                                                                                                                                                                                                                                                                        |                                                                                                                                                                                                                                                                                                                                                                                                                                                                                                                                                                                                 |             |  |               |         |  |          |       |                |   |          |            |   |         |         |                                                                                                                                                                                                                                                                                                                                                                                                                                                                                                                                                                                                                                                                                                                      |
| Adj. R-Square                                                                                                                                                                                                                                                                                                                                                                                                                                                                                                                                                                                                                                                                                                                                                                                                                                                                                                                                                                                                                                                                                                                                                                                                         | 0.99892                                                                                                                                                                                                                                                                                                                                                                                                                                                                                                                                                                                                                                                                                                                                                                                   |                |              |               |                                                             |                                                            |                 |                 |             |               |               |         |          |          |                |                |            |            |            |          |          |           |          |                               |                                                                                                                                                                                                                                                                                                                                                                                                                                                                        |                                                                                                                                                                                                                                                                                                                                                                                                                                                                                                                                                                                                 |             |  |               |         |  |          |       |                |   |          |            |   |         |         |                                                                                                                                                                                                                                                                                                                                                                                                                                                                                                                                                                                                                                                                                                                      |
| 7SOP-F=1                                                                                                                                                                                                                                                                                                                                                                                                                                                                                                                                                                                                                                                                                                                                                                                                                                                                                                                                                                                                                                                                                                                                                                                                              | Value                                                                                                                                                                                                                                                                                                                                                                                                                                                                                                                                                                                                                                                                                                                                                                                     | Standard Error |              |               |                                                             |                                                            |                 |                 |             |               |               |         |          |          |                |                |            |            |            |          |          |           |          |                               |                                                                                                                                                                                                                                                                                                                                                                                                                                                                        |                                                                                                                                                                                                                                                                                                                                                                                                                                                                                                                                                                                                 |             |  |               |         |  |          |       |                |   |          |            |   |         |         |                                                                                                                                                                                                                                                                                                                                                                                                                                                                                                                                                                                                                                                                                                                      |
|                                                                                                                                                                                                                                                                                                                                                                                                                                                                                                                                                                                                                                                                                                                                                                                                                                                                                                                                                                                                                                                                                                                                                                                                                       | tau0                                                                                                                                                                                                                                                                                                                                                                                                                                                                                                                                                                                                                                                                                                                                                                                      | 1.44152E-7     | 6.07017E-8   |               |                                                             |                                                            |                 |                 |             |               |               |         |          |          |                |                |            |            |            |          |          |           |          |                               |                                                                                                                                                                                                                                                                                                                                                                                                                                                                        |                                                                                                                                                                                                                                                                                                                                                                                                                                                                                                                                                                                                 |             |  |               |         |  |          |       |                |   |          |            |   |         |         |                                                                                                                                                                                                                                                                                                                                                                                                                                                                                                                                                                                                                                                                                                                      |
|                                                                                                                                                                                                                                                                                                                                                                                                                                                                                                                                                                                                                                                                                                                                                                                                                                                                                                                                                                                                                                                                                                                                                                                                                       | dE_div_k                                                                                                                                                                                                                                                                                                                                                                                                                                                                                                                                                                                                                                                                                                                                                                                  | 15.78877       | 1.13906      |               |                                                             |                                                            |                 |                 |             |               |               |         |          |          |                |                |            |            |            |          |          |           |          |                               |                                                                                                                                                                                                                                                                                                                                                                                                                                                                        |                                                                                                                                                                                                                                                                                                                                                                                                                                                                                                                                                                                                 |             |  |               |         |  |          |       |                |   |          |            |   |         |         |                                                                                                                                                                                                                                                                                                                                                                                                                                                                                                                                                                                                                                                                                                                      |
|                                                                                                                                                                                                                                                                                                                                                                                                                                                                                                                                                                                                                                                                                                                                                                                                                                                                                                                                                                                                                                                                                                                                                                                                                       | const                                                                                                                                                                                                                                                                                                                                                                                                                                                                                                                                                                                                                                                                                                                                                                                     | 9617.39875     | 436.57805    |               |                                                             |                                                            |                 |                 |             |               |               |         |          |          |                |                |            |            |            |          |          |           |          |                               |                                                                                                                                                                                                                                                                                                                                                                                                                                                                        |                                                                                                                                                                                                                                                                                                                                                                                                                                                                                                                                                                                                 |             |  |               |         |  |          |       |                |   |          |            |   |         |         |                                                                                                                                                                                                                                                                                                                                                                                                                                                                                                                                                                                                                                                                                                                      |
|  <table border="1" data-bbox="438 1523 694 1668"> <thead> <tr> <th colspan="2">Model</th> <th>Raman (User)</th> </tr> </thead> <tbody> <tr> <td>Equation</td> <td colspan="2"><math>1/(C_{\text{Raman}}(T^{n_{\text{Raman}}}) + \text{const})</math></td> </tr> <tr> <td>Reduced Chi-Sqr</td> <td colspan="2">1.02442E-11</td> </tr> <tr> <td>Adj. R-Square</td> <td colspan="2">0.97882</td> </tr> <tr> <td rowspan="4">7SOP-F=1</td> <td>Value</td> <td>Standard Error</td> </tr> <tr> <td>C_raman</td> <td>1694.02911</td> <td>348.23742</td> </tr> <tr> <td>n_Raman</td> <td>2.82124</td> <td>0.26503</td> </tr> <tr> <td>const</td> <td>0</td> <td>0</td> </tr> </tbody> </table>                                                                                                                                                                                                                                                                                                                                                                                                                                             | Model                                                                                                                                                                                                                                                                                                                                                                                                                                                                                                                                                                                                                                                                                                                                                                                     |                | Raman (User) | Equation      | $1/(C_{\text{Raman}}(T^{n_{\text{Raman}}}) + \text{const})$ |                                                            | Reduced Chi-Sqr | 1.02442E-11     |             | Adj. R-Square | 0.97882       |         | 7SOP-F=1 | Value    | Standard Error | C_raman        | 1694.02911 | 348.23742  | n_Raman    | 2.82124  | 0.26503  | const     | 0        | 0                             | <p><b>Raman</b><br/> <math>\tau^{-1} = C_{\text{Raman}} T^{n_{\text{Raman}}}</math></p> <p><math>C_{\text{Raman}} = 1694 \pm 348</math> s<math>^{-1}</math>K<math>^{-n_{\text{Raman}}}</math><br/> <math>n_{\text{Raman}} = 2.8 \pm 0.3</math><br/> <math>R^2 = 0.9996</math></p> <p>The values of the <math>C_{\text{Raman}}</math> parameter should be in the range of <math>10^{-5} - 10^{-1}</math> K<math>^{-n_{\text{Raman}}}</math>s<math>^{-1}</math>. [1]</p> |                                                                                                                                                                                                                                                                                                                                                                                                                                                                                                                                                                                                 |             |  |               |         |  |          |       |                |   |          |            |   |         |         |                                                                                                                                                                                                                                                                                                                                                                                                                                                                                                                                                                                                                                                                                                                      |
| Model                                                                                                                                                                                                                                                                                                                                                                                                                                                                                                                                                                                                                                                                                                                                                                                                                                                                                                                                                                                                                                                                                                                                                                                                                 |                                                                                                                                                                                                                                                                                                                                                                                                                                                                                                                                                                                                                                                                                                                                                                                           | Raman (User)   |              |               |                                                             |                                                            |                 |                 |             |               |               |         |          |          |                |                |            |            |            |          |          |           |          |                               |                                                                                                                                                                                                                                                                                                                                                                                                                                                                        |                                                                                                                                                                                                                                                                                                                                                                                                                                                                                                                                                                                                 |             |  |               |         |  |          |       |                |   |          |            |   |         |         |                                                                                                                                                                                                                                                                                                                                                                                                                                                                                                                                                                                                                                                                                                                      |
| Equation                                                                                                                                                                                                                                                                                                                                                                                                                                                                                                                                                                                                                                                                                                                                                                                                                                                                                                                                                                                                                                                                                                                                                                                                              | $1/(C_{\text{Raman}}(T^{n_{\text{Raman}}}) + \text{const})$                                                                                                                                                                                                                                                                                                                                                                                                                                                                                                                                                                                                                                                                                                                               |                |              |               |                                                             |                                                            |                 |                 |             |               |               |         |          |          |                |                |            |            |            |          |          |           |          |                               |                                                                                                                                                                                                                                                                                                                                                                                                                                                                        |                                                                                                                                                                                                                                                                                                                                                                                                                                                                                                                                                                                                 |             |  |               |         |  |          |       |                |   |          |            |   |         |         |                                                                                                                                                                                                                                                                                                                                                                                                                                                                                                                                                                                                                                                                                                                      |
| Reduced Chi-Sqr                                                                                                                                                                                                                                                                                                                                                                                                                                                                                                                                                                                                                                                                                                                                                                                                                                                                                                                                                                                                                                                                                                                                                                                                       | 1.02442E-11                                                                                                                                                                                                                                                                                                                                                                                                                                                                                                                                                                                                                                                                                                                                                                               |                |              |               |                                                             |                                                            |                 |                 |             |               |               |         |          |          |                |                |            |            |            |          |          |           |          |                               |                                                                                                                                                                                                                                                                                                                                                                                                                                                                        |                                                                                                                                                                                                                                                                                                                                                                                                                                                                                                                                                                                                 |             |  |               |         |  |          |       |                |   |          |            |   |         |         |                                                                                                                                                                                                                                                                                                                                                                                                                                                                                                                                                                                                                                                                                                                      |
| Adj. R-Square                                                                                                                                                                                                                                                                                                                                                                                                                                                                                                                                                                                                                                                                                                                                                                                                                                                                                                                                                                                                                                                                                                                                                                                                         | 0.97882                                                                                                                                                                                                                                                                                                                                                                                                                                                                                                                                                                                                                                                                                                                                                                                   |                |              |               |                                                             |                                                            |                 |                 |             |               |               |         |          |          |                |                |            |            |            |          |          |           |          |                               |                                                                                                                                                                                                                                                                                                                                                                                                                                                                        |                                                                                                                                                                                                                                                                                                                                                                                                                                                                                                                                                                                                 |             |  |               |         |  |          |       |                |   |          |            |   |         |         |                                                                                                                                                                                                                                                                                                                                                                                                                                                                                                                                                                                                                                                                                                                      |
| 7SOP-F=1                                                                                                                                                                                                                                                                                                                                                                                                                                                                                                                                                                                                                                                                                                                                                                                                                                                                                                                                                                                                                                                                                                                                                                                                              | Value                                                                                                                                                                                                                                                                                                                                                                                                                                                                                                                                                                                                                                                                                                                                                                                     | Standard Error |              |               |                                                             |                                                            |                 |                 |             |               |               |         |          |          |                |                |            |            |            |          |          |           |          |                               |                                                                                                                                                                                                                                                                                                                                                                                                                                                                        |                                                                                                                                                                                                                                                                                                                                                                                                                                                                                                                                                                                                 |             |  |               |         |  |          |       |                |   |          |            |   |         |         |                                                                                                                                                                                                                                                                                                                                                                                                                                                                                                                                                                                                                                                                                                                      |
|                                                                                                                                                                                                                                                                                                                                                                                                                                                                                                                                                                                                                                                                                                                                                                                                                                                                                                                                                                                                                                                                                                                                                                                                                       | C_raman                                                                                                                                                                                                                                                                                                                                                                                                                                                                                                                                                                                                                                                                                                                                                                                   | 1694.02911     | 348.23742    |               |                                                             |                                                            |                 |                 |             |               |               |         |          |          |                |                |            |            |            |          |          |           |          |                               |                                                                                                                                                                                                                                                                                                                                                                                                                                                                        |                                                                                                                                                                                                                                                                                                                                                                                                                                                                                                                                                                                                 |             |  |               |         |  |          |       |                |   |          |            |   |         |         |                                                                                                                                                                                                                                                                                                                                                                                                                                                                                                                                                                                                                                                                                                                      |
|                                                                                                                                                                                                                                                                                                                                                                                                                                                                                                                                                                                                                                                                                                                                                                                                                                                                                                                                                                                                                                                                                                                                                                                                                       | n_Raman                                                                                                                                                                                                                                                                                                                                                                                                                                                                                                                                                                                                                                                                                                                                                                                   | 2.82124        | 0.26503      |               |                                                             |                                                            |                 |                 |             |               |               |         |          |          |                |                |            |            |            |          |          |           |          |                               |                                                                                                                                                                                                                                                                                                                                                                                                                                                                        |                                                                                                                                                                                                                                                                                                                                                                                                                                                                                                                                                                                                 |             |  |               |         |  |          |       |                |   |          |            |   |         |         |                                                                                                                                                                                                                                                                                                                                                                                                                                                                                                                                                                                                                                                                                                                      |
|                                                                                                                                                                                                                                                                                                                                                                                                                                                                                                                                                                                                                                                                                                                                                                                                                                                                                                                                                                                                                                                                                                                                                                                                                       | const                                                                                                                                                                                                                                                                                                                                                                                                                                                                                                                                                                                                                                                                                                                                                                                     | 0              | 0            |               |                                                             |                                                            |                 |                 |             |               |               |         |          |          |                |                |            |            |            |          |          |           |          |                               |                                                                                                                                                                                                                                                                                                                                                                                                                                                                        |                                                                                                                                                                                                                                                                                                                                                                                                                                                                                                                                                                                                 |             |  |               |         |  |          |       |                |   |          |            |   |         |         |                                                                                                                                                                                                                                                                                                                                                                                                                                                                                                                                                                                                                                                                                                                      |

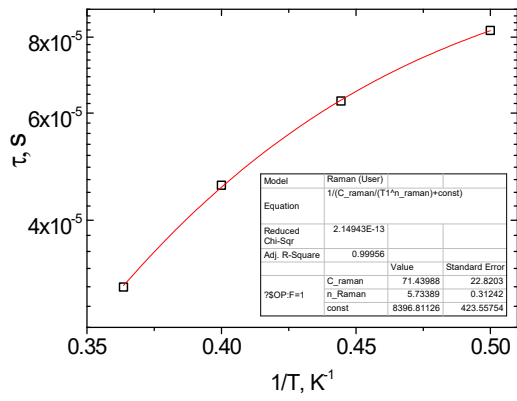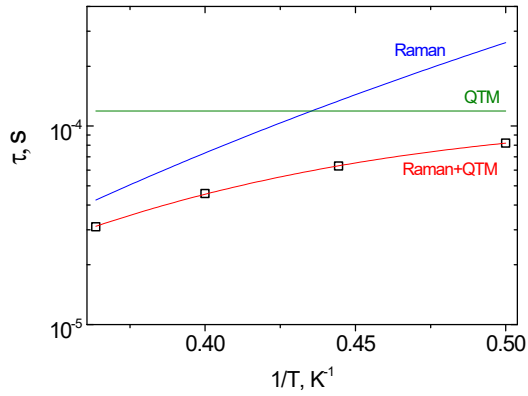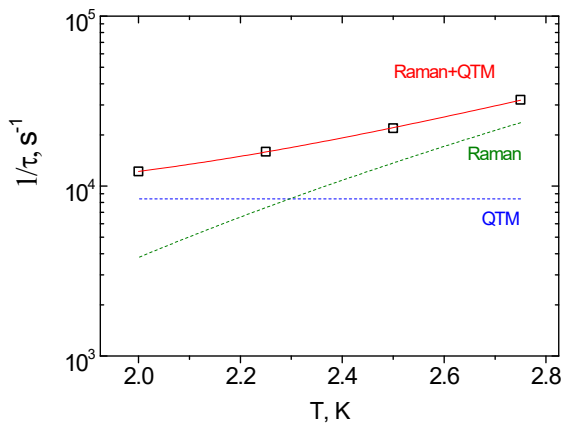

### Raman+ QTM

$$\tau^{-1} = C_{\text{Raman}} T^{n_{\text{Raman}}} + B$$

$$C_{\text{Raman}} = 71.4 \pm 22.8 \text{ s}^{-1} \text{ K}^{-n_{\text{Raman}}}$$

$$n_{\text{Raman}} = 5.7 \pm 0.3$$

$$B = 8397 \pm 424 \text{ s}^{-1}$$

$$R^2 = 0.9996$$

The values of the  $C_{\text{Raman}}$  parameter should be in the range of  $10^{-5} - 10^{-1} \text{ K}^{-n_{\text{Raman}}}\text{s}^{-1}$ . [1]

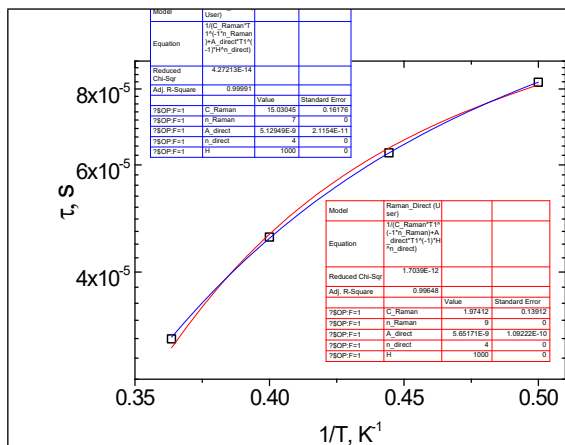

### Raman+Direct

$$\tau^{-1} = C_{\text{Raman}}T^{n_{\text{Raman}}} + A_{\text{direct}}TH^4$$

$$C_{\text{Raman}} = 1.97 \pm 0.14 \text{ s}^{-1}\text{K}^{-n_{\text{Raman}}}$$

$$n_{\text{Raman}} = 9 \text{ (red line)}$$

$$A_{\text{direct}} = 5.7 \cdot 10^{-9} \pm 1.1 \cdot 10^{-10} \text{ K}^{-1}\text{Oe}^{-4}\text{s}^{-1}$$

$$R^2 = 0.9965$$

The values of the  $C_{\text{Raman}}$  parameter should be in the range of  $10^{-5} - 10^{-1} \text{ K}^{-n_{\text{Raman}}}\text{s}^{-1}$ . One of the most adequate parameter values from physical point of view. [1]

$$C_{\text{Raman}} = 15.0 \pm 0.2 \text{ s}^{-1}\text{K}^{-n_{\text{Raman}}}$$

$$n_{\text{Raman}} = 7 \text{ (blue line)}$$

$$A_{\text{direct}} = 5.1 \cdot 10^{-9} \pm 2.1 \cdot 10^{-11} \text{ K}^{-1}\text{Oe}^{-4}\text{s}^{-1}$$

$$R^2 = 0.9999$$

The values of the  $C_{\text{Raman}}$  parameter should be in the range of  $10^{-5} - 10^{-1} \text{ K}^{-n_{\text{Raman}}}\text{s}^{-1}$ . [1]

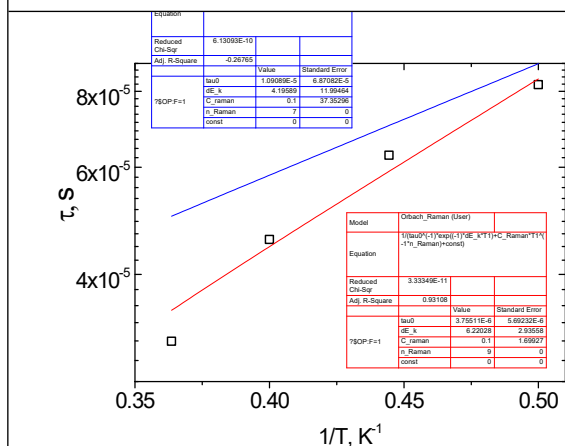

### Orbach+Raman

$$\tau^{-1} = \tau_0^{-1} \cdot \exp(-\Delta E/kT) + C_{\text{Raman}}T^{n_{\text{Raman}}}$$

$$\Delta E/k = 6.2 \pm 2.9 \text{ K}$$

$$\tau_0 = 3.8 \cdot 10^{-6} \pm 5.7 \cdot 10^{-6} \text{ s}$$

$$C_{\text{Raman}} = 0.1 \pm 1.7 \text{ s}^{-1}\text{K}^{-n_{\text{Raman}}}$$

$$n_{\text{Raman}} = 9 \text{ (red line)}$$

$$R^2 = 0.9311$$

The errors exceed the calculated values.

$$\Delta E/k = 4.2 \pm 12.0 \text{ K}$$

$$\tau_0 = 1.1 \cdot 10^{-5} \pm 6.9 \cdot 10^{-5} \text{ s}$$

$$C_{\text{Raman}} = 0.1 \pm 37.3 \text{ s}^{-1}\text{K}^{-n_{\text{Raman}}}$$

$$n_{\text{Raman}} = 7 \text{ (blue line)}$$

$$R^2 = -0.2677 \text{ (?)}$$

The errors exceed the calculated values.

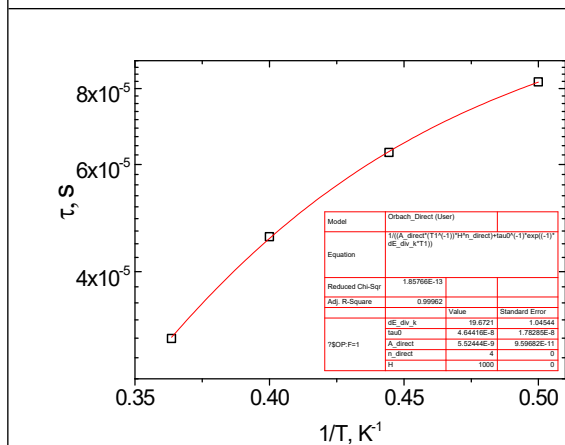

### Orbach+Direct

$$\tau^{-1} = \tau_0^{-1} \cdot \exp(-\Delta E/kT) + A_{\text{direct}}TH^4$$

$$\Delta E/k = 19.7 \pm 1.0 \text{ K}$$

$$\tau_0 = 4.6 \cdot 10^{-8} \pm 1.8 \cdot 10^{-8} \text{ s}$$

$$A_{\text{direct}} = 5.5 \cdot 10^{-9} \pm 9.6 \cdot 10^{-11} \text{ K}^{-1}\text{Oe}^{-4}\text{s}^{-1}$$

$$R^2 = 0.9996$$

The values of relaxation times characteristic of over-barrier one-phonon remagnetization corresponding to the Orbach mechanism should be in the range of  $\sim 10^{-10} - 10^{-12} \text{ s}$ . One of the most adequate parameter values from physical point of view. [1]

## Elemental analysis data and IR spectra frequencies for complexes 1-7.

For **1**, anal. calc. for  $\text{Sm}_2\text{C}_90\text{H}_{106}\text{N}_{20}\text{O}_{40}\text{S}_4$ : C, 42.61, H, 4.21, N 11.04. Found: C, 42.65, H, 4.17, N 11.07. IR of **1**: 3435 w, 3370w, 3098 w, 3001 w, 2916 w, 2866 w, 1671 m, 1621 m, 1609 m, 1572 w, 1529 s, 1457 m, 1396 s, 1338 vs, 1294 m, 1192 w, 1140 m, 1083 m, 1071 m, 1013 s, 956 m, 923 m, 913 m, 838 w, 790 m, 760 m, 721 vs, 708 vs, 632 m, 623 m, 593 m, 549 m, 520 m, 463 m.

For **2**, anal. calc. for  $\text{Gd}_2\text{C}_90\text{H}_{106}\text{N}_{20}\text{O}_{40}\text{S}_4$ : C, 42.38, H, 4.19, N 10.98. Found: C, 42.40, H, 4.20, N 10.95. IR of **2**: 3438 w, 3370w, 3097 w, 2995 w, 2913 w, 2862 w, 1673 s, 1623 m, 1607 m, 1572 w, 1531 s, 1456 m, 1398 vs, 1338 vs, 1272 m, 1192 w, 1146 w, 1085 m, 1072 m, 1015 s, 959 m, 922 m, 915 m, 838 w, 790 m, 759 m, 731 s, 721 vs, 708 vs, 623 m, 593 m, 549 m, 520 m, 477 m, 460 m, 446 w.

For **3**, anal. calc. for  $\text{Tb}_2\text{C}_90\text{H}_{106}\text{N}_{20}\text{O}_{40}\text{S}_4$ : C, 42.32, H, 4.18, N 10.97. Found: C, 42.29, H, 4.14, N 10.95. IR of **2**: 3435 w, 3370w, 3097 w, 2992 w, 2914 w, 2859 w, 1675 s, 1623 m, 1607 m, 1572 w, 1529 s, 1456 m, 1398 vs, 1337 vs, 1272 m, 1191 w, 1150 w, 1085 m, 1072 m, 1015 s, 959 m, 922 m, 915 m, 838 w, 790 m, 759 m, 731 s, 721 vs, 708 vs, 623 m, 593 m, 544 m, 520 m, 472 w, 456 w, 449 w.

For **4**, anal. calc. for  $\text{Dy}_2\text{C}_90\text{H}_{106}\text{N}_{20}\text{O}_{40}\text{S}_4$ : C, 42.21, H, 4.17, N 10.94. Found: C, 42.25, H, 4.15, N 10.90. IR of **2**: 3437 w, 3370w, 3097 w, 2994 w, 2913 w, 2865 w, 1677 s, 1623 m, 1609 m, 1573 w, 1530 s, 1456 m, 1399 s, 1337 vs, 1272 m, 1191 w, 1147 w, 1083 m, 1072 m, 1015 s, 959 m, 922 m, 915 m, 838 w, 790 m, 759 m, 731 s, 721 vs, 708 vs, 623 m, 593 m, 551 m, 520 m, 479 w, 448 w.

For **5**, anal. calc. for  $\text{Ho}_2\text{C}_90\text{H}_{106}\text{N}_{20}\text{O}_{40}\text{S}_4$ : C, 42.13, H, 4.16, N 10.92. Found: C, 42.18, H, 4.11, N 10.88. IR of **2**: 3437 w, 3370w, 3097 w, 2991 w, 2914 w, 2862 w, 1678 s, 1623 m, 1609 m, 1573 w, 1529 s, 1457 s, 1399 s, 1337 vs, 1272 m, 1191 w, 1147 w, 1085 m, 1072 m, 1015 s, 960 m, 922 m, 915 m, 838 w, 790 m, 759 m, 731 s, 719 vs, 708 vs, 625 m, 593 m, 549 m, 523 m, 463 w, 450 w.

For **6**, anal. calc. for  $\text{Er}_2\text{C}_90\text{H}_{106}\text{N}_{20}\text{O}_{40}\text{S}_4$ : C, 42.05, H, 4.16, N 10.90. Found: C, 42.09, H, 4.14, N 10.95. IR of **2**: 3437 w, 3370w, 3097 w, 2991 w, 2914 w, 2860 w, 1679 s, 1623 m, 1609 m, 1573 w, 1529 s, 1457 s, 1401 s, 1338 vs, 1272 m, 1192 w, 1143 w, 1085 m, 1072 m, 1015 s, 960 m, 920 m, 918 m, 838 w, 790 m, 759 m, 731 s, 721 vs, 710 vs, 632 m, 625 m, 595 m, 543 m, 523 m, 462 w, 452 w.

For **7**, anal. calc. for  $\text{Y}_2\text{C}_90\text{H}_{106}\text{N}_{20}\text{O}_{40}\text{S}_4$ : C, 44.78, H, 4.43, N 11.60. Found: C, 44.82, H, 4.44, N 11.62. IR of **2**: 3435 w, 3370 w, 3097 w, 2992 w, 2913 w, 2862 w, 1680 s, 1623 m, 1609 m, 1573 w, 1529 s, 1457 s, 1401 s, 1337 vs, 1272 m, 1191 w, 1147 w, 1085 m, 1072 m, 1017 s, 960 m, 920 m, 915 m, 838 w, 790 m, 759 m, 731 s, 721 vs, 710 vs, 625 m, 595 m, 548 m, 520 m, 467 w, 456 w.

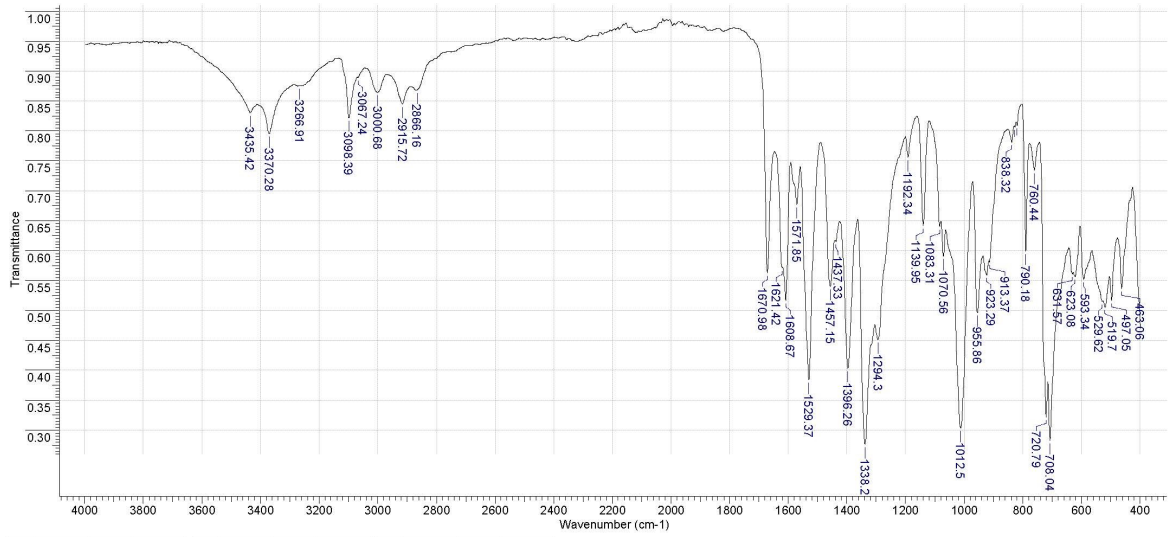

| No | cm-1   | T     | Intensity | No | cm-1    | T     | Intensity | No | cm-1    | T     | Intensity |
|----|--------|-------|-----------|----|---------|-------|-----------|----|---------|-------|-----------|
| 1  | 463.06 | 0.536 | S         | 15 | 913.37  | 0.581 | M         | 29 | 1571.85 | 0.677 | M         |
| 2  | 497.05 | 0.517 | S         | 16 | 923.29  | 0.559 | S         | 30 | 1608.67 | 0.517 | S         |
| 3  | 519.70 | 0.506 | S         | 17 | 955.86  | 0.496 | S         | 31 | 1621.42 | 0.571 | M         |
| 4  | 529.62 | 0.515 | S         | 18 | 1012.50 | 0.304 | VS        | 32 | 1670.98 | 0.563 | M         |
| 5  | 593.34 | 0.552 | S         | 19 | 1070.56 | 0.590 | M         | 33 | 2866.16 | 0.869 | W         |
| 6  | 623.08 | 0.557 | S         | 20 | 1083.31 | 0.640 | M         | 34 | 2915.72 | 0.845 | W         |
| 7  | 631.57 | 0.561 | M         | 21 | 1139.95 | 0.641 | M         | 35 | 3000.68 | 0.865 | W         |
| 8  | 708.04 | 0.283 | VS        | 22 | 1192.34 | 0.756 | M         | 36 | 3067.24 | 0.889 | W         |
| 9  | 720.79 | 0.322 | VS        | 23 | 1294.30 | 0.451 | S         | 37 | 3098.39 | 0.822 | W         |
| 10 | 760.44 | 0.735 | M         | 24 | 1338.20 | 0.276 | VS        | 38 | 3266.91 | 0.876 | W         |
| 11 | 790.18 | 0.599 | M         | 25 | 1396.26 | 0.403 | S         | 39 | 3370.28 | 0.796 | W         |
| 12 | 819.91 | 0.809 | W         | 26 | 1437.33 | 0.615 | M         | 40 | 3435.42 | 0.831 | W         |
| 13 | 826.99 | 0.806 | W         | 27 | 1457.15 | 0.540 | S         |    |         |       |           |
| 14 | 838.32 | 0.781 | W         | 28 | 1529.37 | 0.384 | S         |    |         |       |           |

a

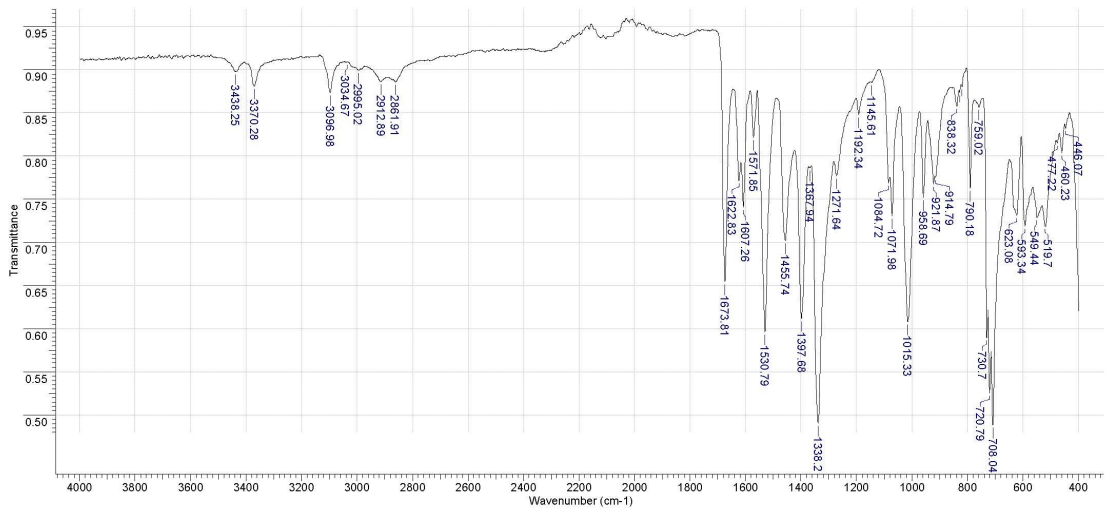

| No | cm-1   | T     | Intensity | No | cm-1    | T     | Intensity | No | cm-1    | T     | Intensity |
|----|--------|-------|-----------|----|---------|-------|-----------|----|---------|-------|-----------|
| 1  | 446.07 | 0.832 | W         | 15 | 838.32  | 0.858 | W         | 29 | 1530.79 | 0.596 | S         |
| 2  | 460.23 | 0.804 | M         | 16 | 914.79  | 0.775 | M         | 30 | 1571.85 | 0.822 | W         |
| 3  | 477.22 | 0.815 | M         | 17 | 921.87  | 0.768 | M         | 31 | 1607.26 | 0.741 | M         |
| 4  | 519.70 | 0.719 | M         | 18 | 958.69  | 0.752 | M         | 32 | 1622.83 | 0.772 | M         |
| 5  | 549.44 | 0.729 | M         | 19 | 1015.33 | 0.608 | S         | 33 | 1673.81 | 0.654 | S         |
| 6  | 593.34 | 0.719 | M         | 20 | 1071.98 | 0.731 | M         | 34 | 2861.91 | 0.886 | W         |
| 7  | 623.08 | 0.731 | M         | 21 | 1084.72 | 0.769 | M         | 35 | 2912.89 | 0.886 | W         |
| 8  | 708.04 | 0.488 | VS        | 22 | 1145.61 | 0.885 | W         | 36 | 2995.02 | 0.899 | W         |
| 9  | 720.79 | 0.525 | VS        | 23 | 1192.34 | 0.848 | W         | 37 | 3034.67 | 0.909 | W         |
| 10 | 730.70 | 0.590 | S         | 24 | 1271.64 | 0.777 | M         | 38 | 3096.98 | 0.873 | W         |
| 11 | 759.02 | 0.857 | W         | 25 | 1338.20 | 0.490 | VS        | 39 | 3370.28 | 0.881 | W         |
| 12 | 790.18 | 0.763 | M         | 26 | 1367.94 | 0.786 | M         | 40 | 3438.25 | 0.898 | W         |
| 13 | 819.91 | 0.880 | W         | 27 | 1397.68 | 0.612 | S         |    |         |       |           |
| 14 | 828.41 | 0.873 | W         | 28 | 1455.74 | 0.702 | M         |    |         |       |           |

b

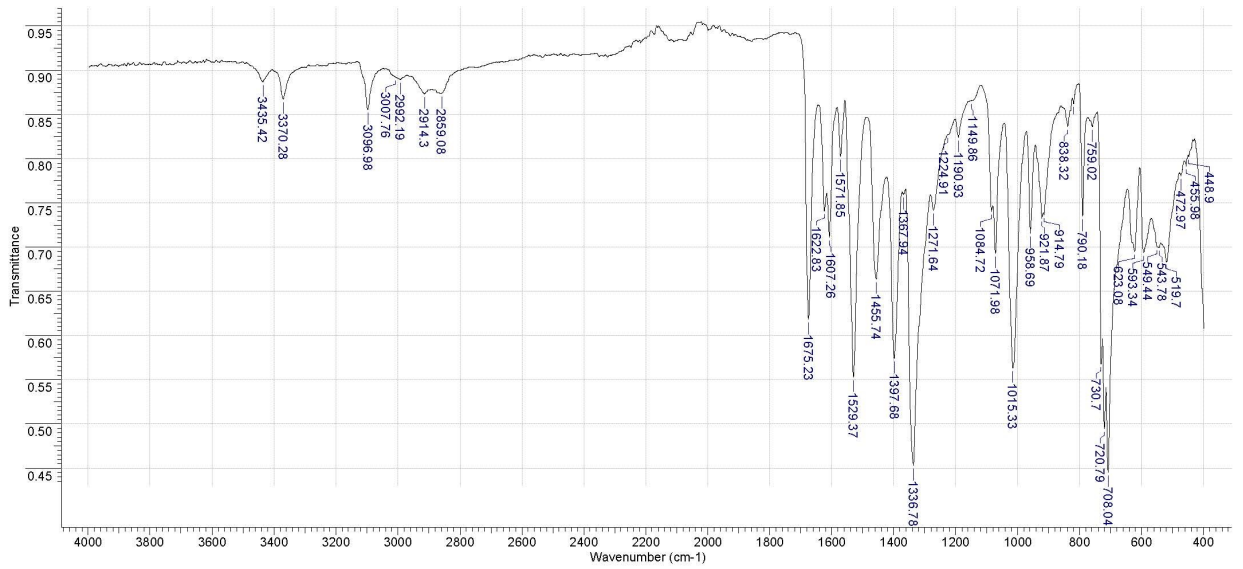

| No | cm-1   | T     | Intensity | No | cm-1    | T     | Intensity | No | cm-1    | T     | Intensity |
|----|--------|-------|-----------|----|---------|-------|-----------|----|---------|-------|-----------|
| 1  | 448.90 | 0.802 | W         | 15 | 838.32  | 0.836 | W         | 29 | 1455.74 | 0.664 | M         |
| 2  | 455.98 | 0.792 | M         | 16 | 914.79  | 0.736 | M         | 30 | 1529.37 | 0.553 | S         |
| 3  | 472.97 | 0.781 | M         | 17 | 921.87  | 0.732 | M         | 31 | 1571.85 | 0.802 | W         |
| 4  | 519.70 | 0.684 | M         | 18 | 958.69  | 0.716 | M         | 32 | 1607.26 | 0.711 | M         |
| 5  | 543.78 | 0.700 | M         | 19 | 1015.33 | 0.563 | S         | 33 | 1622.83 | 0.741 | M         |
| 6  | 549.44 | 0.700 | M         | 20 | 1071.98 | 0.693 | M         | 34 | 1675.23 | 0.618 | S         |
| 7  | 593.34 | 0.693 | M         | 21 | 1084.72 | 0.740 | M         | 35 | 2859.08 | 0.874 | W         |
| 8  | 623.08 | 0.695 | M         | 22 | 1149.86 | 0.866 | W         | 36 | 2914.30 | 0.873 | W         |
| 9  | 708.04 | 0.446 | VS        | 23 | 1190.93 | 0.824 | W         | 37 | 2992.19 | 0.890 | W         |
| 10 | 720.79 | 0.495 | VS        | 24 | 1224.91 | 0.827 | W         | 38 | 3007.76 | 0.892 | W         |
| 11 | 730.70 | 0.568 | S         | 25 | 1271.64 | 0.741 | M         | 39 | 3096.98 | 0.856 | W         |
| 12 | 759.02 | 0.836 | W         | 26 | 1336.78 | 0.453 | VS        | 40 | 3370.28 | 0.867 | W         |
| 13 | 790.18 | 0.735 | M         | 27 | 1367.94 | 0.759 | M         | 41 | 3435.42 | 0.887 | W         |
| 14 | 819.91 | 0.862 | W         | 28 | 1397.68 | 0.574 | S         |    |         |       |           |

c

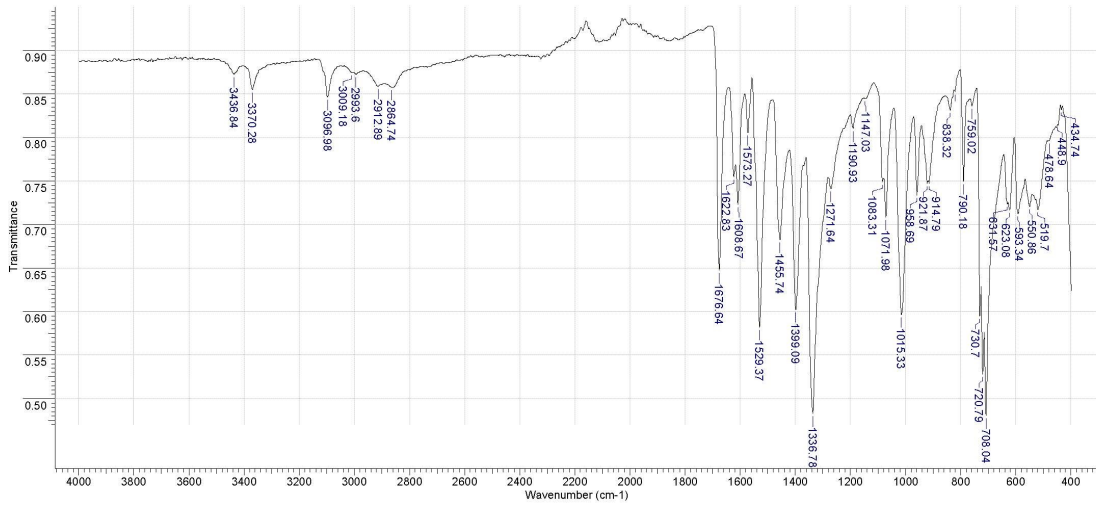

| No | cm-1   | T     | Intensity | No | cm-1    | T     | Intensity | No | cm-1    | T     | Intensity |
|----|--------|-------|-----------|----|---------|-------|-----------|----|---------|-------|-----------|
| 1  | 434.74 | 0.832 | W         | 14 | 821.33  | 0.852 | W         | 27 | 1455.74 | 0.682 | M         |
| 2  | 448.90 | 0.815 | W         | 15 | 838.32  | 0.831 | W         | 28 | 1529.37 | 0.582 | S         |
| 3  | 478.64 | 0.796 | M         | 16 | 914.79  | 0.747 | M         | 29 | 1573.27 | 0.806 | W         |
| 4  | 519.70 | 0.717 | M         | 17 | 921.87  | 0.747 | M         | 30 | 1608.67 | 0.723 | M         |
| 5  | 550.86 | 0.721 | M         | 18 | 958.69  | 0.734 | M         | 31 | 1622.83 | 0.755 | M         |
| 6  | 593.34 | 0.713 | M         | 19 | 1015.33 | 0.597 | S         | 32 | 1676.64 | 0.647 | S         |
| 7  | 623.08 | 0.716 | M         | 20 | 1071.98 | 0.708 | M         | 33 | 2864.74 | 0.858 | W         |
| 8  | 631.57 | 0.724 | M         | 21 | 1083.31 | 0.749 | M         | 34 | 2912.89 | 0.859 | W         |
| 9  | 708.04 | 0.481 | VS        | 22 | 1147.03 | 0.845 | W         | 35 | 2993.60 | 0.872 | W         |
| 10 | 720.79 | 0.528 | S         | 23 | 1190.93 | 0.810 | W         | 36 | 3009.18 | 0.875 | W         |
| 11 | 730.70 | 0.595 | S         | 24 | 1271.64 | 0.741 | M         | 37 | 3096.98 | 0.847 | W         |
| 12 | 759.02 | 0.836 | W         | 25 | 1336.78 | 0.483 | VS        | 38 | 3370.28 | 0.855 | W         |
| 13 | 790.18 | 0.749 | M         | 26 | 1399.09 | 0.602 | S         | 39 | 3436.84 | 0.873 | W         |

d

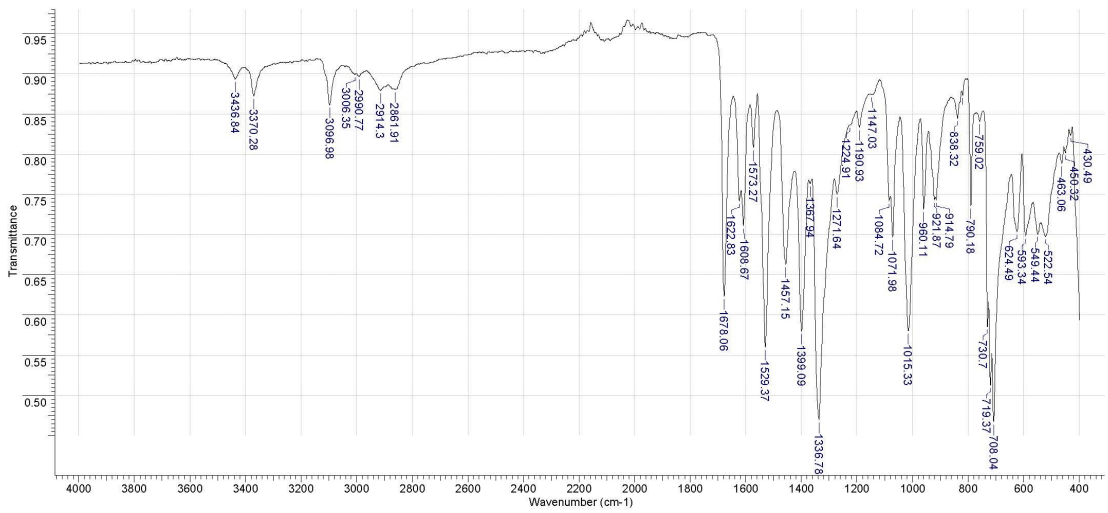

| No | cm-1   | T     | Intensity | No | cm-1    | T     | Intensity | No | cm-1    | T     | Intensity |
|----|--------|-------|-----------|----|---------|-------|-----------|----|---------|-------|-----------|
| 1  | 430.49 | 0.824 | W         | 15 | 914.79  | 0.743 | M         | 29 | 1529.37 | 0.560 | S         |
| 2  | 460.32 | 0.802 | M         | 16 | 921.87  | 0.743 | M         | 30 | 1573.27 | 0.808 | M         |
| 3  | 463.06 | 0.788 | M         | 17 | 960.11  | 0.732 | M         | 31 | 1608.67 | 0.711 | M         |
| 4  | 522.54 | 0.698 | M         | 18 | 1015.33 | 0.580 | S         | 32 | 1622.83 | 0.742 | M         |
| 5  | 549.44 | 0.700 | M         | 19 | 1071.98 | 0.697 | M         | 33 | 1678.06 | 0.623 | S         |
| 6  | 593.34 | 0.698 | M         | 20 | 1084.72 | 0.742 | M         | 34 | 2861.91 | 0.881 | W         |
| 7  | 624.49 | 0.703 | M         | 21 | 1147.03 | 0.874 | W         | 35 | 2914.30 | 0.879 | W         |
| 8  | 708.04 | 0.467 | VS        | 22 | 1190.93 | 0.833 | W         | 36 | 2990.77 | 0.897 | W         |
| 9  | 719.37 | 0.513 | VS        | 23 | 1224.91 | 0.837 | W         | 37 | 3006.35 | 0.900 | W         |
| 10 | 730.70 | 0.585 | S         | 24 | 1271.64 | 0.750 | M         | 38 | 3096.98 | 0.861 | W         |
| 11 | 759.02 | 0.841 | W         | 25 | 1336.78 | 0.470 | VS        | 39 | 3370.28 | 0.873 | W         |
| 12 | 790.18 | 0.736 | M         | 26 | 1367.94 | 0.764 | M         | 40 | 3436.84 | 0.893 | W         |
| 13 | 819.91 | 0.873 | W         | 27 | 1399.09 | 0.580 | S         |    |         |       |           |
| 14 | 838.32 | 0.845 | W         | 28 | 1457.15 | 0.663 | S         |    |         |       |           |

e

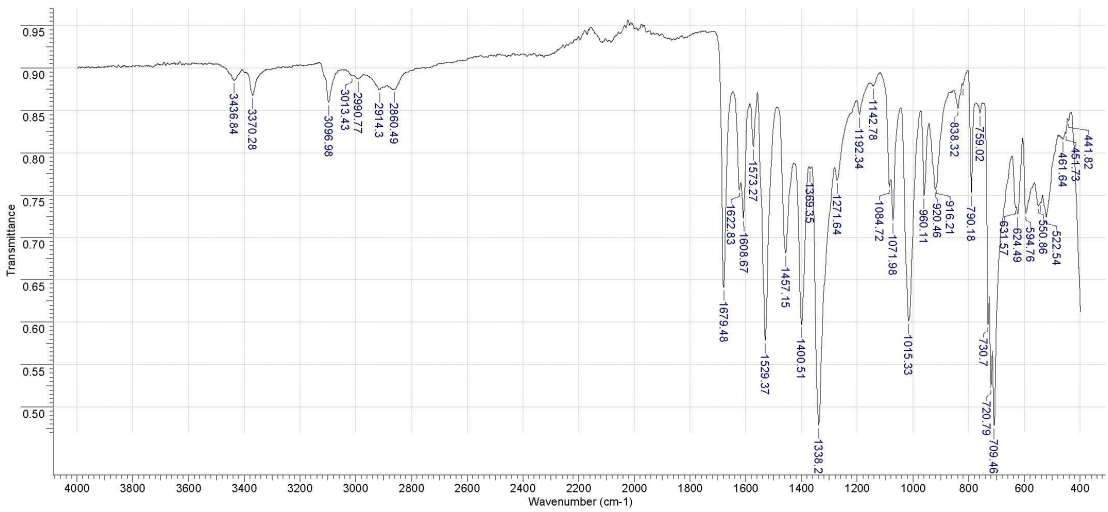

| No | cm-1   | T     | Intensity | No | cm-1    | T     | Intensity | No | cm-1    | T     | Intensity |
|----|--------|-------|-----------|----|---------|-------|-----------|----|---------|-------|-----------|
| 1  | 441.82 | 0.837 | W         | 15 | 821.33  | 0.879 | W         | 29 | 1400.51 | 0.597 | S         |
| 2  | 451.73 | 0.822 | W         | 16 | 838.32  | 0.852 | W         | 30 | 1457.15 | 0.681 | M         |
| 3  | 461.64 | 0.816 | W         | 17 | 916.21  | 0.759 | M         | 31 | 1529.37 | 0.578 | S         |
| 4  | 522.54 | 0.724 | M         | 18 | 917.62  | 0.759 | M         | 32 | 1573.27 | 0.807 | M         |
| 5  | 542.36 | 0.741 | M         | 19 | 920.46  | 0.757 | M         | 33 | 1608.67 | 0.723 | M         |
| 6  | 550.86 | 0.737 | M         | 20 | 960.11  | 0.749 | M         | 34 | 1622.83 | 0.756 | M         |
| 7  | 594.76 | 0.728 | M         | 21 | 1015.33 | 0.602 | S         | 35 | 1679.48 | 0.641 | S         |
| 8  | 624.49 | 0.727 | M         | 22 | 1071.98 | 0.720 | M         | 36 | 2860.49 | 0.875 | W         |
| 9  | 631.57 | 0.735 | M         | 23 | 1084.72 | 0.760 | M         | 37 | 2914.30 | 0.874 | W         |
| 10 | 709.46 | 0.478 | VS        | 24 | 1142.78 | 0.879 | W         | 38 | 2990.77 | 0.897 | W         |
| 11 | 720.79 | 0.523 | VS        | 25 | 1192.34 | 0.845 | W         | 39 | 3013.43 | 0.890 | W         |
| 12 | 730.70 | 0.597 | S         | 26 | 1271.64 | 0.767 | M         | 40 | 3096.98 | 0.859 | W         |
| 13 | 759.02 | 0.847 | W         | 27 | 1338.20 | 0.479 | VS        | 41 | 3370.28 | 0.868 | W         |
| 14 | 790.18 | 0.752 | M         | 28 | 1369.35 | 0.781 | M         | 42 | 3436.84 | 0.885 | W         |

f



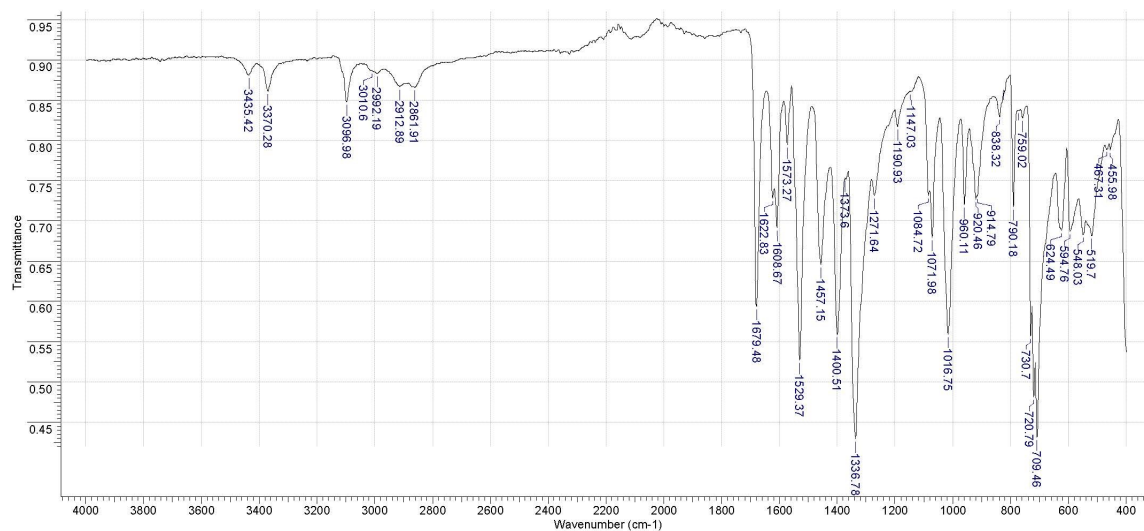

| No | cm-1   | T     | Intensity | No | cm-1    | T     | Intensity | No | cm-1    | T     | Intensity |
|----|--------|-------|-----------|----|---------|-------|-----------|----|---------|-------|-----------|
| 1  | 455.98 | 0.788 | M         | 14 | 838.32  | 0.829 | W         | 27 | 1457.15 | 0.646 | M         |
| 2  | 467.31 | 0.789 | M         | 15 | 914.79  | 0.730 | M         | 28 | 1529.37 | 0.527 | S         |
| 3  | 519.70 | 0.682 | M         | 16 | 920.46  | 0.727 | M         | 29 | 1573.27 | 0.795 | M         |
| 4  | 548.03 | 0.683 | M         | 17 | 960.11  | 0.720 | M         | 30 | 1608.67 | 0.692 | M         |
| 5  | 594.76 | 0.687 | M         | 18 | 1016.75 | 0.559 | S         | 31 | 1622.83 | 0.728 | M         |
| 6  | 624.49 | 0.688 | M         | 19 | 1071.98 | 0.680 | M         | 32 | 1679.48 | 0.594 | S         |
| 7  | 709.46 | 0.432 | VS        | 20 | 1084.72 | 0.731 | M         | 33 | 2861.91 | 0.866 | W         |
| 8  | 720.79 | 0.461 | VS        | 21 | 1147.03 | 0.861 | W         | 34 | 2912.89 | 0.867 | W         |
| 9  | 730.70 | 0.557 | S         | 22 | 1190.93 | 0.817 | W         | 35 | 2992.19 | 0.863 | W         |
| 10 | 759.02 | 0.828 | W         | 23 | 1271.64 | 0.732 | M         | 36 | 3010.60 | 0.886 | W         |
| 11 | 771.77 | 0.837 | W         | 24 | 1336.78 | 0.429 | VS        | 37 | 3096.98 | 0.848 | W         |
| 12 | 790.18 | 0.718 | M         | 25 | 1373.60 | 0.753 | M         | 38 | 3370.28 | 0.861 | W         |
| 13 | 824.16 | 0.863 | W         | 26 | 1400.51 | 0.559 | S         | 39 | 3435.42 | 0.881 | W         |

g

Fig. S17. IR spectra of complexes 1-7 (a – g, resp.).

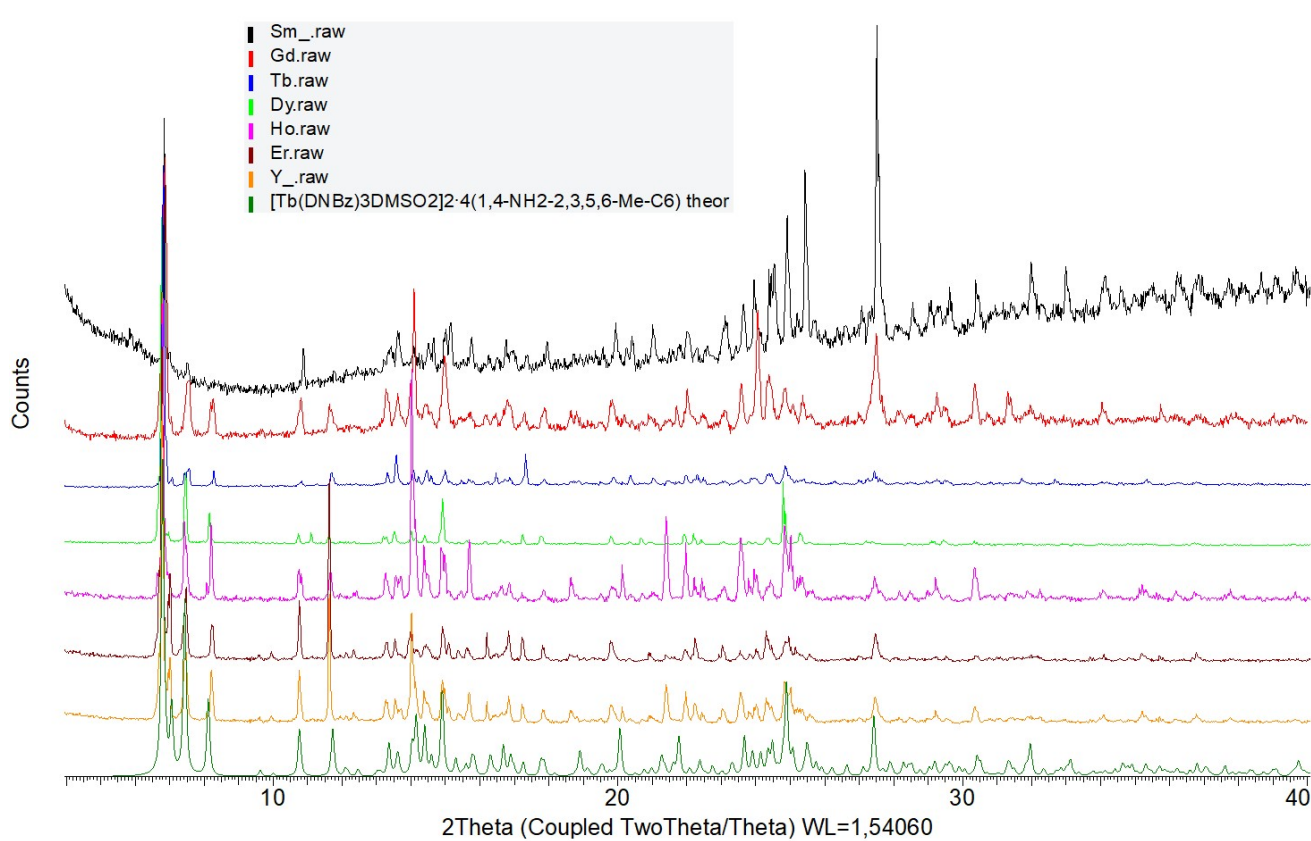

Fig. S18. Powder X-ray diffractograms of the complexes 1-7.
